# Supplementary material
Source: PubMed Central journal article supplement (PMC7274537)

## Supplementary Appendix

This appendix has been provided by the authors to give readers additional information about their work.

Supplement to: Bangalore S, Maron DJ, O'Brien SM, et al. Management of coronary disease in patients with advanced kidney disease. *N Engl J Med* 2020;382:1608-18. DOI: [10.1056/NEJMoa1915925](https://doi.org/10.1056/NEJMoa1915925)

# Supplementary Appendix

This appendix has been provided by the authors to give readers additional information about their work.

## Table of Contents

|                                                                                                                         |           |
|-------------------------------------------------------------------------------------------------------------------------|-----------|
| I. ISCHEMIA-CKD Committees, CCC, Trial-Related Personnel .....                                                          | 3         |
| II. Site Personnel .....                                                                                                | 11        |
| III. Supplementary Methods .....                                                                                        | 32        |
| <b>Required Quality Metrics for Participating Sites .....</b>                                                           | <b>32</b> |
| <b>Guidelines for Revascularization Therapy .....</b>                                                                   | <b>34</b> |
| <b>Fractional Flow Reserve Use Algorithm .....</b>                                                                      | <b>34</b> |
| <b>Strategies to minimize contrast induced acute kidney injury after cardiac catheterization/PCI .....</b>              | <b>35</b> |
| <b>Strategies to minimize acute kidney injury after CABG .....</b>                                                      | <b>36</b> |
| <b>Guidelines for Medical Therapy .....</b>                                                                             | <b>37</b> |
| <b>Goals of Medical Therapy .....</b>                                                                                   | <b>37</b> |
| <b>Definitions of Clinical Outcomes.....</b>                                                                            | <b>40</b> |
| <b>Death.. .....</b>                                                                                                    | <b>40</b> |
| <b>Myocardial Infarction .....</b>                                                                                      | <b>40</b> |
| <b>Hospitalization for Unstable Angina .....</b>                                                                        | <b>44</b> |
| <b>Resuscitated Cardiac Arrest .....</b>                                                                                | <b>44</b> |
| <b>Hospitalization for Heart Failure .....</b>                                                                          | <b>45</b> |
| <b>Stroke .....</b>                                                                                                     | <b>46</b> |
| <b>Sample Size and Power Calculations .....</b>                                                                         | <b>47</b> |
| IV. Supplementary Tables .....                                                                                          | 48        |
| <b>Table S1. ISCHEMIA and ISCHEMIA-CKD: Differences in Trial Design .....</b>                                           | <b>48</b> |
| <b>Table S2. Industry Support .....</b>                                                                                 | <b>49</b> |
| <b>Table S3. Ischemia Eligibility Criteria by Stress Test Modality .....</b>                                            | <b>50</b> |
| <b>Table S4. Inclusion and Exclusion Criteria .....</b>                                                                 | <b>51</b> |
| <b>Table S5. Baseline and On-Trial Physiologic Measurements, Risk Factors, and Medications by Treatment Group .....</b> | <b>53</b> |

|                                                                                                                                                          |    |
|----------------------------------------------------------------------------------------------------------------------------------------------------------|----|
| Table S6. Coronary Angiography and Revascularization in the Invasive Strategy .....                                                                      | 54 |
| Table S7. Outcomes based on Secondary Definition of Myocardial Infarction .....                                                                          | 56 |
| Table S8. Rate of Revascularization in ACS trials of Invasive vs. Conservative which<br>Randomized Participants Prior to Defining Coronary Anatomy ..... | 57 |
| V. Supplementary Figures.....                                                                                                                            | 58 |
| Figure S1. Assessment of Proportional Hazards Assumption for Treatment Effect .....                                                                      | 58 |
| Figure S2. Participant Flow .....                                                                                                                        | 64 |
| Figure S3. Select Medications Use over Time by Treatment Group .....                                                                                     | 65 |
| Figure S4. Cumulative Incidence Plot of First Cardiac Catheterization and First<br>Revascularization by Treatment Group .....                            | 68 |
| S4a. Coronary Angiography .....                                                                                                                          | 68 |
| S4b. Revascularization.....                                                                                                                              | 69 |
| Figure S5. Reasons for Coronary Angiography and Revascularization at 3 Years in the<br>Conservative Group.....                                           | 70 |
| Figure S6. Posterior distribution for the Bayesian analysis for the primary outcome .....                                                                | 71 |
| Figure S7. Cumulative Incidence Plot of Non Procedural MI and Procedural MI .....                                                                        | 72 |
| S7a. Non Procedural MI .....                                                                                                                             | 72 |
| S7b. Procedural MI .....                                                                                                                                 | 73 |
| Figure S8. Cumulative Incidence Plot of Stroke .....                                                                                                     | 74 |
| Figure S9. Cumulative Incidence Plot of Death or Initiation of Dialysis (in those not on dialysis<br>at baseline) .....                                  | 75 |
| Figure S10. Cumulative Incidence Plot of New Dialysis .....                                                                                              | 76 |
| Figure S11. Heterogeneity of Treatment Effect Analyses for the Major Secondary Outcome .                                                                 | 77 |
| Figure S12. Heterogeneity of Treatment Effect for the Primary Outcome as a Function of<br>Baseline Ejection Fraction .....                               | 78 |
| Figure S13. Heterogeneity of Treatment Effect for the Primary Outcome as a Function of<br>Baseline eGFR.....                                             | 79 |

## I. ISCHEMIA-CKD Committees, CCC, Trial-Related Personnel

### **Steering Committee**

Sripal Bangalore, Principal Investigator  
Judith S. Hochman, ISCHEMIA trial Chair  
David J. Maron, ISCHEMIA trial Co-Chair  
Glenn M. Chertow, Nephrologist  
William Boden, ISCHEMIA trial Co-PI  
Bruce Ferguson, ISCHEMIA trial Co-PI  
Robert Harrington, ISCHEMIA trial Co-PI  
Gregg W. Stone, ISCHEMIA trial Co-PI  
David O. Williams, ISCHEMIA trial Co-PI

### **Renal Committee**

Charles A. Herzog (Chair)  
Sripal Bangalore  
Carlo Briguori  
David M. Charytan  
Glenn M. Chertow  
Jerome Fleg  
Peter A. McCullough  
Roxana Mehran  
Ruth Kirby

### **Publications Sub-Committee**

Sripal Bangalore (Chair)  
Karen Alexander  
Jerome Fleg  
Judith S. Hochman  
David J. Maron  
Roy Mathew  
Sean M. O'Brien  
Harmony R. Reynolds  
Mandeep Sidhu

### **Optimal Medical Therapy Committee (Same as ISCHEMIA)**

William Boden (Co-Chair)  
David J. Maron (Co-Chair)  
Christie Ballantyne  
Sripal Bangalore  
Karen Calfas \*\*  
Bernard R. Chaitman  
Mary Ann Champagne  
Michael Davidson  
Jerome Fleg

Peter A. McCullough  
Jonathan Newman  
Peter Stone

**Optimal Revascularization Therapy Planning Committee (Same as ISCHEMIA)**

Gregg W. Stone (Chair)

**Subcommittee: CABG**

Bruce Ferguson (Co-Chair)  
Philippe Menasche (Co-Chair)  
Sripal Bangalore  
Michael Davidson \*\*  
Stephen Fremes  
Robert Guyton  
Michael Mack  
Fred Mohr  
Anupama Rao  
Joe Sabik  
Oz Shapira  
David Taggart  
James Tatoulis

**Subcommittee: PCI**

David Williams (Co-Chair)  
Sripal Bangalore  
Jim Blankenship  
Sorin Brener  
Chris Buller  
Antonio Colombo  
Bernard de Bruyne  
Philippe G n reux  
Robert Harrington  
Dean Kereiakes  
Thierry Lefevre  
Jeffrey Moses

**Clinical Events (Same as ISCHEMIA)**

**Endpoint Definition Panel**

Bernard R. Chaitman (Chair)  
Karen P. Alexander  
Judith S. Hochman  
Ken Mahaffey  
David J. Maron  
Gregg W. Stone  
Harvey White

**Clinical Event Review Committee**

Bernard R. Chaitman (Chair)

Salvador Cruz-Flores  
Nicholas Danchin  
Eli Feen  
Mario J. Garcia  
Paul Hauptman  
Abhay A. Laddu  
Eugene Passamani  
Ileana L. Pina  
Maarten Simoons  
Hicham Skali  
Kristian Thygesen  
David Waters

**CEC Administrative Group**

Karen P. Alexander  
Patricia Endsley \*  
Gerard Esposito  
Jeffrey Kanters  
John Pownall  
Dimitrios Stournaras

**BioRepository Committee (Same as ISCHEMIA)**

Jeffrey Berger (Chair)  
Claes Held  
Iftikhar Kullo  
Bruce McManus  
Kristin Newby

**EQOL Committee (Same as ISCHEMIA)**

Daniel Mark (Co-Chair)  
John Spertus (Co-Chair)  
David Cohen  
William Weintraub

**Recruitment for Women & Minorities (Same as ISCHEMIA)**

C. Noel Bairey Merz (Chair)  
Raffaele Bugiardini  
Jelena Celutkiene  
Jorge Escobedo  
Angela Hoyer  
Radmila Lyubarova  
Deirdre Mattina  
Jesus Peteiro  
Harmony R. Reynolds  
Paola Smanio

**DSMB Members**

Lawrence Friedman (Chair)  
Jeffrey Anderson  
Jessica Berg \*  
David DeMets  
C. Michael Gibson  
Gervasio Lamas  
Nicole Deming  
Jonathan Himmelfarb  
Pamela Ouyang  
Pamela Woodard

**Independent Statistical Analysis Center for DSMB Reporting (Same as ISCHEMIA)**

Frank Harrell  
Samuel Nwosu

**National Heart, Lung, and Blood Institute**

Jerome L. Fleg, Project Officer  
Ruth Kirby

**ISCHEMIA Clinical Coordinating Center (CCC)**

***Study Leadership***

Sripal Bangalore (Principal Investigator)

***CCC Faculty***

Jeffrey Berger (Director of the Biorepository, ISCHEMIA Regional Leader)  
Roy Mathew (Country Lead Nephrologist for US)  
Jonathan Newman (ISCHEMIA Regional Leader)  
Harmony R. Reynolds (ISCHEMIA Regional Leader)  
Mandeep Sidhu (US-VA Regional Co-Leader)

***Program Director***

Stephanie Mavromichalis

***Project Managers***

Gia Cobb\*  
Stephanie Ferket \*  
Andre Gabriel \*

***Clinical Research Associates***

Diana Cukali\*  
Kevin McMahon \*

***Clinical Trial Assistants***

Ahmed Ayoub\*  
Matthew Shinseki \*  
Paula Wilson\*  
Solomon Yakubov \*

**Data Analyst**

Mark Xavier \*

**ISCHEMIA Statistical and Data Coordinating Center, Duke Clinical Research Institute**  
**(Same as ISCHEMIA)**

Sean M. O'Brien (Principal Investigator)

Karen P. Alexander (Co-Principal Investigator)

Akshay Bagai\*

Samuel Broderick

Michelle Crowder

Derek Cyr

Patricia Endsley

Jyotsna Garg

Xiangqiong Gu

Robert Harrington\*

Lisa Hatch

Anne Heath\*

Zhen Huang

Jeffrey Kanters

Kerry Lee\*

Jeff Leimberger

Jill Marcus

Courtney Page

Wanda Parker\*

Wayne Pennachi

John Pownall

Frank Rockhold

Susanna Stevens

Allegra Stone

Dimitrios Stournaras

Omar Thompson

Sheri Ussery

Jennifer White\*

Mary (Kaye) Williams

Weibing Xing

Songlin Zhu

**ECG/ETT CoreLab (Same as ISCHEMIA)**

Bernard R. Chaitman (Director)

Jane Eckstein

Bandula Guruge

Mary Streif



**Angiographic Core Lab (Same as ISCHEMIA)**

Ziad Ali (Director)

Philippe Genereux (Director) \*

Maria A. Alfonso

Maria P. Corral

Javier J. Garcia

Jennifer Horst

Ivana Jankovic

Maayan Konigstein

Mitchel B. Lustre\*

Yolayfi Peralta

Raquel Sanchez

**Academic Research Organizations (AROs) (Same as ISCHEMIA)**

**Associazione Nazionale Medici Cardiologi Ospedalieri (ANMCO) -Italy & Switzerland**

Aldo P. Maggioni (Country Leader)

Francesca Bianchini

Martina Ceseri

Andrea Lorimer

Marco Magnoni

Francesco Orso

Laura Sarti

Martinia Tricoli\*

**Brazilian Clinical Research Institute (BCRI) - Brazil**

Antonio Carvalho (Country Leader)\*\*

Renato Lopes (Country Leader)

Lilian Mazza Barbosa

Tauane Bello Duarte

Tamara Colaiácovo Soares

Julia de Aveiro Morata

Pedro Carvalho

Natalia de Carvalho Maffei

Flávia Egydio\*

Anelise Kawakami\*

Janaina Oliveira\*

Elissa Restelli Piloto\*

Jaqueline Pozzibon\*

**Canadian Heart Research Centre (CHRC) - Canada**

Shaun Goodman (Country Leader)

Diane Camara

Neamat Mowafy

Caroline Spindler

**China Oxford Centre for International Health Research - China**

Lixin Jiang (Country Leader)

Hao Dai

Fang Feng

Jia Li

Li Li\*

Jiamin Liu

Qiulan Xie

Haibo Zhang

Jianxin Zhang

Lihua Zhang

Liping Zhang

Ning Zhang

Hui Zhong

*Estudios Clínicos Latino America (ECLA) - Argentina*

Rafael Diaz\*

Claudia Escobar

Maria Eugenia Martin\*

Andrea Pascual\*

*Foundation for Biomedical Research of La Paz University Hospital (FIBHULP) - Spain*

José Lopez-Sendon (Country Leader)

Paloma Moraga

Victoria Hernandez

Almudena Castro

Maria Posada\*

Sara Fernandez

José Luis Narro Villanueva

Rafael Selgas

*French Alliance for Cardiovascular Trials (FACT) - France*

Gabriel Steg (Country Leader)

Helene Abergel

Jean Michel Juliard

*Green Lane Coordinating Centre Ltd. (GLCC) -Malaysia, NewZealand, Singapore, Taiwan,*

*Thailand*

Harvey White (Country Leader)

Caroline Alswelier

*KU Leuven Research & Development - Belgium\**

Frans Van de Werf (Country Leader)

Kathleen Claes

Kaatje Goetschalckx

Ann Luyten

Valerie Robesyn

*South Australian Health and Medical Research Institute Ltd (SAHMRI) - Australia*

Joseph B. Selvanayagam (Country Leader)

Deirdre Murphy

**Contract Research Organizations (CROs) for ISCHEMIA Trial**

*FOCUS Clinical Research Center d.o.o. Belgrade - Serbia*

Nevena Garcevic

Jelena Stojkovic

*iProcess Global Research Inc. - India*

Asker Ahmed

Richa Bhatt

Nitika Chadha\*

Vijay Kumar\*

Sadath Lubna\*

Pushpa Naik

Shruti Pandey\*

Karthik Ramasamy\*

Mohammed Saleem

Pratiksha Sharma

Hemalata Siddaram\*

*\*past members / past organizations*

*\*\*deceased*

## II. Site Personnel

| Country (No. Randomizations) | Investigator(s)                                                                                                                                                                                      | Study Coordinator(s)                                                                                          | City & State (if applicable) | Institution (No. Randomizations)                    |
|------------------------------|------------------------------------------------------------------------------------------------------------------------------------------------------------------------------------------------------|---------------------------------------------------------------------------------------------------------------|------------------------------|-----------------------------------------------------|
| <b>United States (159)</b>   |                                                                                                                                                                                                      |                                                                                                               |                              |                                                     |
| Lead Country Nephrologist    |                                                                                                                                                                                                      |                                                                                                               |                              |                                                     |
| Roy Mathew, MD               | Mayil S. Krishnam, MD, MBA<br>Jeffrey C. Milliken, MD<br>Pranav M. Patel, MD<br>Arnold H. Seto, MD<br>Kevin T. Harley, MD (N)<br>Michael A. Gibson, MD<br>Byron J. Allen, MD<br>Wei Ling Lau, MD (N) | Shirin Heydari, MS<br>Edgar Karanjah, MD<br>Wanda C. Marfori, MD<br>Eduardo Hernandez-Rangel, MD<br>Pam Singh | Orange, CA                   | University of California Irvine Medical Center (23) |
|                              | Patricia Pellikka, MD<br>LaTonya J. Hickson, MD (N)                                                                                                                                                  | Gaylin Petty, CVT<br>Susan K. Milbrandt<br>Dawn D. Shelstad                                                   | Rochester, MN                | Mayo Clinic (16)                                    |
|                              | Harmony R. Reynolds, MD<br>Jonathan D. Newman, MD, MPH<br>Sripal Bangalore, MD, MHA<br>Lawrence M. Phillips, MD<br>Muhamed Saric, MD<br>Olga Zhdanova, MD (N)                                        | Stanley E. Cobos, BA<br>Kirsten J. Quiles, MS<br>Raven R. Dwyer, MPH<br>Dalisa Espinosa, MBS                  | New York, NY                 | NYU Langone Medical Center-Belleue Hospital (15)    |
|                              | Kreton Mavromatis, MD<br>Jason Linefsky, MD<br>Harold Franch, MD (N)                                                                                                                                 | John Doan, MD<br>Raven Lee, CCRP<br>Risha Patel                                                               | Decatur, GA                  | Atlanta VA Medical Center (13)                      |
|                              | Anjali Acharya, MD (N)<br>Seth Sokol, MD<br>Jay Meisner, MD<br>Amit Kakkar, MD<br>Tarek Rashid, MD<br>Hatem Elabd, MD                                                                                | Jeanne Russo, RN<br>Cidney Schultz, RN                                                                        | Bronx, NY                    | Jacobi Medical Center (12)                          |
|                              | Charles Herzog, MD<br>Mengistu Simegn, MD                                                                                                                                                            | Shari Mackedanz<br>Barbara Wicklund                                                                           | Minneapolis, MN              | Hennepin County Medical Center (9)                  |

|                                                                                                                                                                                                                                                                                                               |                                                                                                                                                         |              |                                                     |
|---------------------------------------------------------------------------------------------------------------------------------------------------------------------------------------------------------------------------------------------------------------------------------------------------------------|---------------------------------------------------------------------------------------------------------------------------------------------------------|--------------|-----------------------------------------------------|
| Salvatore P. Costa, MD<br>Terrance Welch, MD<br>Michael Chobanian, MD (N)                                                                                                                                                                                                                                     | Henry C. Stokes, RN<br>Gaylin Petty, CVT                                                                                                                | Lebanon, NH  | Dartmouth Hitchcock Medical Center (7)              |
| Subhash Banerjee, MD                                                                                                                                                                                                                                                                                          | Preeti Kamath, BDS, MHA, CCRP<br>Ishita Tejani, BDS, MS, MSPH                                                                                           | Dallas, TX   | V.A. North Texas Health Care System (6)             |
| Adedayo Adeboye, MD<br>Roy Mathew, MD (N)                                                                                                                                                                                                                                                                     | Amy Flowers<br>Kathryn Mason<br>Anjana Rishmawi                                                                                                         | Columbia, SC | William Jennings Bryan Dorn V.A. Medical Center (5) |
| Sudhanva S. Hegde, MD                                                                                                                                                                                                                                                                                         | Stanley E. Cobos, BA<br>Raven R. Dwyer, MPH<br>Dalisa Espinosa, MBS<br>Kirsten J. Quiles, MS<br>Carolyn J. Gruber, PA-C<br>Noelle M. Durfee, MS<br>PA-C | Brooklyn, NY | Kings County Hospital Center (9)                    |
| Khaled Abdul-Nour, MD<br>Lalathaksha Kumbar, MD (N)<br>Jerry Yee, MD (N)                                                                                                                                                                                                                                      | Heather Golden<br>Naima L. Ogletree, DNP, APRN-BC<br>Schawana Thaxton, DNP, NP-C                                                                        | Detroit, MI  | Henry Ford Health System (4)                        |
| Alec Moorman, MD<br>Bilal Malik, MD (N)                                                                                                                                                                                                                                                                       | Fatima Ranjbaran, RN<br>Bryn Smith, BS<br>Carly Ohmart                                                                                                  | Seattle, WA  | University of Washington Medical Center (4)         |
| Radmilar Lyubarova, MD<br>Mohammad El-Hajjar, MD<br>Mandeep S. Sidhu, MD, MBA<br>Steven A. Fein, MD<br>Mikhail T. Torosoff, MD, PhD<br>Radmila Lyubarova, MD<br>Sulagna Mookherjee, MD<br>Krzysztof Drzymalski, MD<br>Rafia Chaudhry, MD (N)<br>Krishnakumar Hongalgi, MD (N)<br>Arif Asif, MD (N)(2012-2015) | Wendy L. Stewart, MS<br>Kristin M. Salmi, BS                                                                                                            | Albany, NY   | Albany Medical Center Hospital (3)                  |

Loay Salman, MD (N)(2015-2018)

|                                       |                          |                |                                                        |
|---------------------------------------|--------------------------|----------------|--------------------------------------------------------|
| Patricia K. Nguyen, MD                | Davis Vo, BS             | Palo Alto, CA  | VA Palo Alto Healthcare System (3)                     |
| Yiming Lit, MD (N)                    | James Hirsch, BS         |                |                                                        |
| Steven P. Sedlis, MD                  | Leandro C. Maranan, CCRC | New York, NY   | VA New York Harbor Health Care System (3)              |
| Robert M. Donnino, MD                 |                          |                |                                                        |
| Jeffrey Lorin, MD                     |                          |                |                                                        |
| David Goldfarb, MD (N)                |                          |                |                                                        |
| Mohammad El-Hajjar, MD                | Jennifer Thomson, MA     | Albany, NY     | Samuel Stratton VA Medical Center of Albany NY (2)     |
| Paul Der Mesropian, MD (N)            |                          |                |                                                        |
| Joseph Sacco, MD                      |                          |                |                                                        |
| Naveed Akhtar, MD                     |                          |                |                                                        |
| Maris Orgera, MD                      |                          |                |                                                        |
| Mandeep S. Sidhu, MD, MBA (2012-2016) |                          |                |                                                        |
| Roy Mathew, MD (N) (2012-2015)        |                          |                |                                                        |
| Elvira Gosmanova, MD (N) (2015-2018)  |                          |                |                                                        |
| Fadi Hage, MD                         | Badhma Valaiyapathi, MD  | Birmingham, AL | UAB Vascular Biology and Hypertension Program (2)      |
| Dana Rizk, MD (N)                     |                          |                |                                                        |
| James E. Davies, MD                   |                          |                |                                                        |
| Massoud Leesar, MD                    |                          |                |                                                        |
| Jaekyeong Heo, MD                     |                          |                |                                                        |
| Amy Iskandrian, MD                    |                          |                |                                                        |
| Firas Al Solaiman, MD                 |                          |                |                                                        |
| Satinder Singh, MD                    |                          |                |                                                        |
| Peter H. Stone, MD                    | Hermine Osseni, MS       | Boston, MA     | Brigham & Women's Hospital, Harvard Medical School (2) |
| David Charytan, MD (N)                | Charlene Wiyarand (BS)   |                |                                                        |
|                                       | Peter Douglass, BA       |                |                                                        |
|                                       | Hayley Pomeroy, BA       |                |                                                        |
|                                       | Alexandra Craft, BA      |                |                                                        |
|                                       | Bethany Harvey, BA       |                |                                                        |
| Kevin Marzo, MD                       | Wendy Drewes, RN         | Mineola, NY    | NYU Winthrop (2)                                       |
| Juan Gaztanaga, MD                    |                          |                |                                                        |
| Shayan Shirazian, MD (N)              | Dipti Patel, RN          |                |                                                        |
| Lekshmi Dharmarajan, MD               | Jenne M. Jose, PA        | Bronx, NY      | NYU-HHC Lincoln Medical and Mental Health Center (2)   |
|                                       | Stanley E. Cobos, BA     |                |                                                        |

|                                                                                         |                                                                                                                                   |                   |                                                          |
|-----------------------------------------------------------------------------------------|-----------------------------------------------------------------------------------------------------------------------------------|-------------------|----------------------------------------------------------|
|                                                                                         | Raven R. Dwyer, MPH<br>Kirsten J. Quiles, MS                                                                                      |                   |                                                          |
| Janani Rangaswami, MD (N)<br>Christian Witzke, MD<br>Gregg Pressman, MD                 | Rachel Murphy, BS<br>Kinnari Murphy, MPH                                                                                          | Philadelphia, PA  | Albert Einstein Medical Center (2)                       |
| John B. Kostis, MD<br>Abel E. Moreyra, MD<br>Jonathan Lebowitz, MD (N)                  | Nora M. Cosgrove, RN                                                                                                              | New Brunswick, NJ | Cardiovascular Institute, Rutgers RWJ Medical School (1) |
| Ellis W. Lader, MD<br>Beth Stefanchik, MD (N)                                           | Martha Meyer, RN, MSN                                                                                                             | Kingston, NY      | Mid Valley Cardiology (1)                                |
| Sampoonima Setty, MD<br>Balaji Srinivasan, MD (N)                                       | Kimberly E. Halverson, RHIT<br>Christine Roraff, RN<br>Jonean Thorsen, RN                                                         | La Crosse, WI     | Gundersen Lutheran Medical Center (1)                    |
| Rita Coram, MD                                                                          | Anne Marie Webb, BSN<br>Ellie Fridell, BS<br>Heidi Wilson, BS                                                                     | Louisville, KY    | University of Louisville (1)                             |
| David Booth, MD<br>John Kotter, MD<br>Ahmed Abdel-Latif, MD, PhD<br>Sadiq Ahmed, MD (N) | Yvonne Taul, RN<br>Caroline Rodgers, RN<br>Jennifer Isaacs, MS<br>Viktoria Bulkley, RN<br>Laura True, RN<br>Alexandra Hunter, MPH | Lexington, KY     | Lexington VA Medical Center (1)                          |
| Michelle Ratliff, MD<br>Karen Sevilla, MD (N)                                           | Robyn Elliott<br>Jennifer Hogan                                                                                                   | Albuquerque, NM   | New Mexico V.A. Healthcare System (1)                    |
| James J. Jang, MD<br>Gennie Yee, MD<br>Deepa Ramaswamy, MD (N)                          | Olivia Anaya                                                                                                                      | San Jose, CA      | Kaiser Permanente San Jose (1)                           |
| Michel Georges Khouri, MD<br>John Middleton, MD (N)                                     | Kristine Arges<br>Melissa LeFevre<br>Jennifer Tomfohr                                                                             | Durham, NC        | Duke University Medical Center (1)                       |
| Jason T. Call, MD<br>David Sisson, MD (N)                                               | Stephanie, M. Lane, RN, BSN, CCRN<br>Jennifer L. Stanford, RN, MSN                                                                | Winchester, VA    | Winchester Cardiology and Vascular Medicine, PC (1)      |

|                                                                                                                                   |                                                                       |                         |                                                                                                                 |
|-----------------------------------------------------------------------------------------------------------------------------------|-----------------------------------------------------------------------|-------------------------|-----------------------------------------------------------------------------------------------------------------|
| Prakash Deedwania, MD<br>Kiran Reddy, MD<br>Mei Hwang, MD (N)                                                                     | Antonia Vega                                                          | Fresno, CA              | UCSF - Fresno Community<br>Regional Medical Center (1)                                                          |
| Steven Weitz, MD<br>Page Salanger, MD (N)                                                                                         | Steven Giovannone<br>Lori Pritchard, RN                               | Schenectady,<br>NY      | Cardiology Associates of<br>Schenectady P.C. (1)                                                                |
| Ray Wyman, MD                                                                                                                     | Joy Burkhardt, CCRP<br>Suellen Hosino, RN,<br>BSN, CCRP               | Torrance, CA            | Torrance Memorial Medical<br>Center (1)                                                                         |
| Khaled Dajani, MD<br>Holly Mattix-Kramer, MD (N)<br>Verghese Mathew, MD                                                           | Carol M. Kartje, BSN                                                  | Maywood, IL             | Loyola University Medical Center<br>(1)                                                                         |
| Michael D. Shapiro, DO<br>Jose Rueda, MD (N)                                                                                      | Aynun Naher, MBBS,<br>MS<br>David Schlichting, LPN                    | Portland, OR            | Oregon Health & Science<br>University (1)                                                                       |
| Omar Almousalli, MD<br>John Lehman, MD<br>Norbert Urbanski, MD                                                                    | Elizabeth Capasso-<br>Gulve<br>Alaine Melanie Loehr<br>Marlowe Mosley | Fairview<br>Heights, IL | Advanced Heart Care Group /<br>MEDICORICIUM, L.L.C. (1)                                                         |
| Alexander M. Chernyavskiy, MD,<br>PhD<br>Evgeniy I. Kretoy, MD<br>Igor O. Grazhdankin, MD<br>Alexander Sergeevich Borisov, MD (N) | Ivan A. Naryshkin, MD                                                 | Novosibirsk             | E. Meshalkin National Medical<br>Research Center of the Ministry<br>of Health of the Russian<br>Federation (73) |
| Leo A. Bockeria, MD, PhD<br>Karen Petrosyan, MD, PhD<br>Evgeny Shutov, MD (N)                                                     | Olga Bockeria, MD, PhD<br>Zalina Kudzoeva, MD                         | Moscow                  | National Medical Research<br>Center for Cardiovascular<br>Surgery (34)                                          |

**Russia (111)**

Lead Country Cardiologist  
Olga Bockeria, MD, PhD  
Lead Country Nephrologist  
Evgeny Shutov, MD



|                                      |                   |                  |                                            |
|--------------------------------------|-------------------|------------------|--------------------------------------------|
| Leonid L. Bershtein, MD, PhD         | Irina Subbotina   | Saint Petersburg | North-Western State Medical University (4) |
| Sergey A. Sayganov, MD, PhD          | Victoria Gumerova |                  |                                            |
| Anastasia M. Kuzmina-Krutetskaya, MD |                   |                  |                                            |
| Elizaveta V. Zbyshevskaya, MD, PhD   |                   |                  |                                            |
| Nana O. Katamadze, MD, PhD           |                   |                  |                                            |
| Vladimir Ryasniansky, MD (N)         |                   |                  |                                            |

---

**Poland (105)**

Lead Country Cardiologists  
 Radoslaw Pracon, MD, PhD  
 Marcin Demkow, MD, PhD  
 Lead Country Nephrologist  
 Robert Malecki, MD

|                          |                          |          |                                                                                                                   |
|--------------------------|--------------------------|----------|-------------------------------------------------------------------------------------------------------------------|
| Tomasz Mazurek, MD, PhD  | Jakub Maksym, MD         | Warszawa | Medical University of Warsaw (57)                                                                                 |
| Karolina Wojtera, MD     |                          |          |                                                                                                                   |
| Anna Fojt, MD            |                          |          |                                                                                                                   |
| Ewa Szczerba, MD         |                          |          |                                                                                                                   |
| Piotr Pruszczyk, MD, PhD | Andrzej Łabyk, MD        | Warszawa | Department of Internal Medicine and Cardiology, Infant Jesus Teaching Hospital, Medical University of Warsaw (22) |
| Marek Roik, MD, PhD      | Agnieszka Szramowska, MD |          |                                                                                                                   |
|                          | Olga Zdończyk, MD        |          |                                                                                                                   |
| Marcin Demkow, MD, PhD   | Olga Walesiak            | Warsaw   | Coronary and Structural Heart Diseases Department, Institute of Cardiology (19)                                   |
| Radoslaw Pracon, MD, PhD | Katarzyna Malinowska     |          |                                                                                                                   |
| Cezary Kepka, MD PhD     |                          |          |                                                                                                                   |
| Anna Teresinska, MD PhD  |                          |          |                                                                                                                   |
| Karolina Kryczka, MD PhD |                          |          |                                                                                                                   |
| Jan Henzel, MD PhD       |                          |          |                                                                                                                   |
| Mateusz Solecki, MD PhD  |                          |          |                                                                                                                   |
| Edyta Kaczmarska, MD PhD |                          |          |                                                                                                                   |
| Robert Malecki, MD (N)   |                          |          |                                                                                                                   |
| Jaroslaw Drozd, PhD      | Marta Swiderek, MA       | Lodz     | Cardiology Clinic, Medical University in Lodz (7)                                                                 |

|                                         |                     |
|-----------------------------------------|---------------------|
| Bartosz Czarniak, MD                    | Ewelina Wojtala, MA |
| Malgorzata Frach (formerly Stasiak), MD |                     |
| Konrad Szymczyk, MD                     |                     |
| Iwona Niedzwiecka, MD                   |                     |
| Sebastian Sobczak, MD                   |                     |
| Tomasz Ciurus, MD                       |                     |
| Piotr Jakubowski, MD                    |                     |
| Magdalena Misztal-Teodorczyk, MD        |                     |
| Dawid Teodorczyk, MD                    |                     |
| Aleksandra Fraczak, MD                  |                     |
| Marcin Szkopiak, MD                     |                     |
| Patrycja Lebioda, MD                    |                     |
| Michal Wlodarczyk, MD                   |                     |
| Anna Plachcinska, MD                    |                     |
| Jacek Kusmierek, MD                     |                     |
| Magdalena Miller, MD                    |                     |
| Halina Marciniak, MD                    |                     |
| Karolina Wojtczak-Soska, MD             |                     |
| Katarzyna Łuczak, MD                    |                     |
| Tomasz Tarchalski, MD                   |                     |
| Anna Cichocka-Radwan, MD                |                     |

---

**India (92)**

Lead Country Cardiology  
Balram Bhargava, DM  
Lead Country Nephrologist  
Sandeep Mahajan, MD

|                                              |                                                       |           |                                    |
|----------------------------------------------|-------------------------------------------------------|-----------|------------------------------------|
| Sajeev Chakanalil Govindan, MD, DNB, DM, PhD | Anjali Anand, MSc                                     | Calicut   | Government Medical College (23)    |
| Rajesh Gopalan Nair, MD, DNB, DM             | Janitha Raj, B.Tech                                   |           |                                    |
| Meleamadathil Srilatha, MD, DM (N)           | Reshma Ravindran, MSc<br>Rajalekshmi VS, MSc, MScCRRA |           |                                    |
| Atul Mathur, MD                              | Ajit Singh Narula, MD                                 |           | Fortis Escort Heart Institute (13) |
| Upendra Kaul, MD                             | Vijay Kher, MD                                        | New Delhi |                                    |
| Sanjeev Gulati MD, DM (N)                    | Puneet Sodhi, MD                                      |           |                                    |

---

|                                                                                                                                                                                                                                                                                                                                                                                                                         |                                                                                   |            |                                                                          |
|-------------------------------------------------------------------------------------------------------------------------------------------------------------------------------------------------------------------------------------------------------------------------------------------------------------------------------------------------------------------------------------------------------------------------|-----------------------------------------------------------------------------------|------------|--------------------------------------------------------------------------|
| Anoop Mathew, MD<br>Eapen Punnoose, MD<br>TA Kishore, MD (N)<br>Satish Sankaranarayanan, MD (N)                                                                                                                                                                                                                                                                                                                         | Binoy Mannekkattukudy<br>Kurian                                                   | Kolenchery | MOSC Medical College Hospital<br>(12)                                    |
| Ranjan Kachru, MD<br>Sanjeev Gulati, MD (N)                                                                                                                                                                                                                                                                                                                                                                             | Abhishek Dubey,<br>PGDACR                                                         | New Delhi  | Fortis Healthcare Fl.t Lt. Rajan<br>Dhall Hospital (11)                  |
| Balram Bhargava, DM<br>Sandeep Mahajan, MD (N)<br>G.Karthikeyan, DM<br>S.Ramakrishnan, DM<br>Sandeep Seth, DM<br>Rakesh Yadav, DM<br>Sandeep Singh, DM<br>Ambuj Roy, DM<br>Neeraj Parakh, DM<br>Sunil Kumar Verma, DM<br>Rajiv Narang, DM<br>Sundeep Mishra, DM<br>Nitish Naik, DM<br>Gautam Sharma, DM<br>Shiv Kumar Choudhary, M.Ch<br>Chetan Patel, DNB<br>Gurpreet Gulati, MD<br>Sanjeev Sharma, MD<br>V K Bahl, DM | Chandini Suvarna, BDS                                                             | New Delhi  | All India Institute Of Medical<br>Sciences (8)                           |
| Neeraj Pandit, MD, DM<br>Ajay Sharma, MD, DM<br>Niruta Sharma MD<br>Hemant Shakhar Mahapatra MD                                                                                                                                                                                                                                                                                                                         | Sheromani Bajaj<br>Vandana Yadav,<br>Msc, PGDACR<br>Girish Mishra, Msc,<br>PGDACR | New Delhi  | Dr Ram Manohar Lohia Hospital<br>(5)                                     |
| Cholenahally Nanjappa Manjunath,<br>MD, DM                                                                                                                                                                                                                                                                                                                                                                              | Nandita Nataraj,<br>BE (Biotech)<br>PGDICRCDM                                     | Bengaluru  | Sri Jayadeva Institute of<br>Cardiovascular Sciences and<br>Research (4) |

|                                         |                                               |           |                                                                           |
|-----------------------------------------|-----------------------------------------------|-----------|---------------------------------------------------------------------------|
| Nagaraja Moorthy, MD, DM                | Soundarya Nayak,<br>BE(Biotech)<br>PGDICRCMD  |           |                                                                           |
| Satvic Cholenahally Manjunath,<br>MD,DM | Mahevamma Mylarappa,<br>GNM (General Nursing) |           |                                                                           |
| Suryaprakash Narayanappa,<br>MBBS       |                                               |           |                                                                           |
| Umesh Lingaraj, MD (N)                  |                                               |           |                                                                           |
| Veerabhadra Gupta, MD (N)               |                                               |           |                                                                           |
| Milind Avdhoot Gadkari, MD              | Sheetal Rupesh Karwa,<br>BHMS                 | Pune      | KEM Hospital Pune (4)                                                     |
| Siddharth Gadage, MD DNB                | Suvarna Kolhe, MSc                            |           |                                                                           |
| Tapan Umesh Pillay, BHMS MSc            |                                               |           |                                                                           |
| Valentine Lobo, MD (N)                  |                                               |           |                                                                           |
| Johann Christopher, MD, DNB             | K. Manjula Rani, MSc.                         | Hyderabad | Gurunanak CARE Hospital (3)                                               |
| Nirmal Kumar, MD, DM                    | M. Sowjanya Reddy,<br>BSc                     |           |                                                                           |
| Suresh Kumar, MD, DM (N)                | K. Preethi, BSc                               |           |                                                                           |
| John Jose, MD                           | Anu Tharini                                   | Vellore   | Christian Medical College (3)                                             |
| Vinoi George David, MD (N)              | Anandaroop Lahiri                             |           |                                                                           |
| Gurpreet S. Wander, DM                  | Baljeet Kaur, MSc<br>(Biotechnology)          | Ludhiana  | Hero DMC Heart Institute,<br>Dayanand Medical College and<br>Hospital (2) |
| Rohit Tandon, MD                        | Sonika Gupta, MBA, B.<br>Pharmacy             |           |                                                                           |
| Sarju Ralhan, M.Ch (CTVS)               |                                               |           |                                                                           |
| Naved Aslam, DM                         |                                               |           |                                                                           |
| Abhishek Goyal, DM                      |                                               |           |                                                                           |
| Vikas Makkar, DM (N)                    |                                               |           |                                                                           |
| S.K. Dwivedi, DM                        | Roma Tewari, PG                               | Lucknow   | King George's Medical<br>University, Department of<br>Cardiology (2)      |
| V.S. Narain, DM                         | Meenakshi Mishra, PG                          |           |                                                                           |
| Sharad Chandra, DM                      | Shivali Patel                                 |           |                                                                           |
|                                         | Suman Singh, PG                               |           |                                                                           |
| Johann Christopher, MD                  | Sowjanya Reddy                                | Hyderabad | CARE Hospital (1)                                                         |
| Praneeth Polamuri, MD                   | Manjula Rani                                  |           |                                                                           |
| Vikranth Reddy, MD, DNB (N)             |                                               |           |                                                                           |
| Upendra Kaul, MD                        | Priyadarshani Arambam                         | New Delhi | Batra Hospital and Medical<br>Research Centre (BHMRC) (1)                 |

Bebek Singh

**China (70)**

Lead Country Cardiologist

Lixin Jiang, MD, PhD

Lead Country Nephrologists

Xuemei Li, MD

|                                                               |                                                                                                |           |                                                              |
|---------------------------------------------------------------|------------------------------------------------------------------------------------------------|-----------|--------------------------------------------------------------|
| Hong Cheng, MD<br>Weijing Bian, MD<br>Guoqin Wang, MD         | Jing Dong, MD<br>Xiaoyi Xu, MD                                                                 | Beijing   | Beijing Anzhen Hospital (24)                                 |
| Jiyan Chen, MD<br>Zhiming Ye, MD (N)                          | Haojian Dong<br>Peiyu He<br>Chunli Xia<br>Junqing Yang<br>Qi Zhong                             | Guangzhou | Guangdong General Hospital (15)                              |
| Xin Fu, MD<br>Zhangsuo Liu, MD (N)                            | Dan Gao<br>Dengke Jiang<br>Ran Leng<br>Xutong Wang<br>Qianqian Yuan<br>Lili Zhang              | Zhengzhou | The First Affiliated Hospital of Zhengzhou University (13)   |
| Shuyang Zhang, MD, PhD<br>Zhenyu Liu, MD<br>Xuemei Li, MD (N) | Ying Wang, MD<br>Yechen Han, MM<br>Lihong Xu, RN<br>Zhenyu Liu<br>Gang Chen, MD<br>Rongrong Hu | Beijing   | Peking Union Medical College Hospital (11)                   |
| Yitong Ma, MD (N)<br>Yining Yang, MD                          | Dongze Li<br>Xiaomei Li<br>Xiang Ma<br>Zixiang Yu<br>Qian Zhao                                 | Urumqi    | First Affiliated Hospital of Xinjiang Medical University (7) |
| Carlo Briguori, MD                                            | Francesca De Micco                                                                             | Naples    | Clinica Mediterranea (52)                                    |

**Italy (62)**

Lead Country Cardiologist

Francesco Orso, MD

|                                                                                              |                                                                   |        |                                                                                              |
|----------------------------------------------------------------------------------------------|-------------------------------------------------------------------|--------|----------------------------------------------------------------------------------------------|
| Gian Piero Perna, MD<br>Marco Marini, MD<br>Gabriele Gabrielli, MD<br>Mario D'arezzo, MD (N) | Francesca Pietrucci,<br>PhD                                       | Ancona | Cardiology and CCU - Ospedali Riuniti Ancona (7)                                             |
| Marco Sicuro, MD<br>Valentina Pellu, MD (N)                                                  | Gianpiero Leone, MD<br>Francesco Pisano, MD<br>Cristina Bare, BSc | Aosta  | Ospedale Regionale Umberto Parini (1)                                                        |
| Paolo Calabro, MD<br>Tiziana Formisano, MD<br>Piero Tassinario, MD (N)                       | Fabio Fimiani                                                     | Napoli | AORN Dei Colli "V. Monaldi"<br>UOC Cardiologia Università della Campania "L. Vanvitelli" (1) |
| Marcello Galvani, MD<br>Filippo Ottani, MD<br>Marco De Fabritis, MD (N)                      | Chiara Attanasio                                                  | Forli  | Ospedale "G.B. Morgagni – L. Pierantoni" Forli (AUSL della Romagna) (1)                      |

### Mexico (30)

Lead Country Cardiologist  
Jorge Escobedo, MD  
Lead Country Nephrologist  
Magdalena Madero, MD

|                                                                                                                                                                                                                                                            |                             |                 |                                                  |
|------------------------------------------------------------------------------------------------------------------------------------------------------------------------------------------------------------------------------------------------------------|-----------------------------|-----------------|--------------------------------------------------|
| Juan Manuel López Quijano, MD, MSc<br>Alejandro Chevaile Ramos, MD (N)<br>Jorge Carrillo Calvillo, MD                                                                                                                                                      | Teresa Delgadillo           | San Luis Potosi | Hospital Central Dr. Ignacio Morones Prieto (16) |
| Jorge Escobedo, MD<br>Rubén Baleón-Espinosa, MD<br>Arturo S Campos-Santaolalla, MD<br>Elihú Durán-Cortés, MD<br>José M Flores-Palacios, MD<br>Andrés García-Rincón, MD<br>Moisés Jiménez-Santos, MD<br>Joaquín V Peñafiel, MD<br>José A Ortega-Ramírez, MD | Ramon de Jesús-Pérez,<br>RN | Benito Juarez   | Instituto Mexicano del Seguro Social (10)        |

Aquiles Valdespino-Estrada, MD

|                                   |                    |             |                                                        |
|-----------------------------------|--------------------|-------------|--------------------------------------------------------|
| Erick Alexánderson Rosas, MD      | María Pérez García | Mexico City | Instituto Nacional de Cardiología "Ignacio Chávez" (2) |
| <u>Magdalena Madero, DM (N)</u>   |                    |             |                                                        |
| Guillermo Garcia-Garcia (N)       | Lorena Lopez, BS   | Guadalajara | Hospital Civil de Guadalajara Fray Antonio Alcalde (2) |
| <u>Jonathan S. Chavez-Iñiguez</u> |                    |             |                                                        |

**Canada (24)**

Lead Country Cardiologists  
Akshay Bagai, MD, MHS  
Kevin R. Bainey, MD, MSc  
Lead Country Nephrologist  
Ron Wald, MDCM, MPH

|                                                                                                                                                                                                                            |                                                                                   |                    |                                                   |
|----------------------------------------------------------------------------------------------------------------------------------------------------------------------------------------------------------------------------|-----------------------------------------------------------------------------------|--------------------|---------------------------------------------------|
| Kevin R. Bainey, MD, MSc<br>Neesh Pannu, MD (N)                                                                                                                                                                            | Norma Hogg, RN<br>Suzanne Welsh, RN                                               | Edmonton, AB       | University of Alberta (15)                        |
| Asim N. Cheema, MD, PhD                                                                                                                                                                                                    | Khrystyna Kushniriuk, HBSc, MD                                                    | Toronto, ON        | St. Michael's Hospital (3)                        |
| Akshay Bagai, MD, MHS<br>Ron Wald, MDCM, MPH (N)<br>Shaun Goodman, MD, MSc<br>John Joseph Graham, MRCP, MB ChB, BSc<br>Mark Peterson, MD, FRCSC, PhD<br>Chi-Ming Chow, MD, CM, MSc<br>Beth Abramson, MD, MSc               | Mohammed Hussain<br>Olugbenga Bello                                               |                    |                                                   |
| Graham Wong, MD<br>Kenneth Gin, MD<br>Christopher Fordyce, MD                                                                                                                                                              | Jackie Chow, BSN<br>Andrew Starovoytov, MD<br>Naomi Uchida, BSN<br>Ngairé Meadows | Vancouver, BC      | Vancouver General Hospital (2)                    |
| Ariel Diaz, MD<br>Philippe Rheault, MD<br>Alejandro Gisbert, MD<br>Alain Raymond, MD<br>Yanek Pépin-Dubois, MD<br>Miguel Barrero, MD<br>Carl-Éric Gagné, MD<br>Mark Garand, MD<br>Ricardo Costa, MD<br>Catherine Lemay, MD | Isabelle Roy, RN<br>Patricia Alarie, RN<br>Linda Arcand, RN<br>Estelle Montpetit  | Trois-Rivieres, QC | Centre Hospitalier de Regional Trois-Rivieres (1) |

|                                                                                                                                                                                                                                                                                   |                                                                |              |                                                                                                                                  |
|-----------------------------------------------------------------------------------------------------------------------------------------------------------------------------------------------------------------------------------------------------------------------------------|----------------------------------------------------------------|--------------|----------------------------------------------------------------------------------------------------------------------------------|
| Ying Tung Sia, MD<br>Pierre Gervais, MD<br>Alain Rheault, MD                                                                                                                                                                                                                      |                                                                |              |                                                                                                                                  |
| Pallav Garg, MBBS, MSc<br>Matthew Weir, MD (N)                                                                                                                                                                                                                                    | Sandy Carr, RN<br>Catherine Bone, RN                           | London, ON   | London Health Sciences Centre (1)                                                                                                |
| Amar Uxa, MD<br>Michael Farkouh, MD<br>Christopher Chan, MD (N)                                                                                                                                                                                                                   | Nadia Asif<br>Suzana Tavares                                   | Toronto, ON  | University Health Network (1)                                                                                                    |
| Philippe Généreux, MD<br><br>Jean Diodati, MD<br>François Madore, MD (N)                                                                                                                                                                                                          | Chantale Mercure, RN                                           | Montréal, QC | Centre Intégré Universitaire De Santé et de Services Sociaux du Nord de l'île de Montréal /Hôpital du Scaré-Cœur de Montréal (1) |
| <b>Singapore (14)</b><br>Lead Country Cardiologist<br>Kian-Keong Poh, MD<br>Lead Country Nephrologist<br>Titus Lau, MD                                                                                                                                                            |                                                                |              |                                                                                                                                  |
| Kian-Keong Poh, MD<br>Ping Chai, MD<br>Titus Lau, MD (N)<br>Joshua P. Loh, MD<br>Edgar L. Tay, MD<br>Kristine Teoh, MD<br>Lynette L. Teo, MD<br>Ching-Ching Ong, MD<br>Raymond C. Wong, MD<br>Poay-Huan Loh, MD<br>Theodoros Kofidis, MD<br>Wan Xian Chan, MD<br>Koo Hui Chan, MD | Sik-Yin V Tan, BSc<br>Winnie C Sia, BSc<br>Audrey W Leong, BSc | Singapore    | National University Heart Center Singapore (11)                                                                                  |
| David Foo, MBBS<br>Jason Loh Kwok Kong, MD<br>Ching Min Er, MD<br>Fahim Haider Jafary, MD<br>Tracy Tan, MD (N)                                                                                                                                                                    | Li Hai Yan, RN                                                 | Singapore    | Tan Tock Seng Hospital (2)                                                                                                       |



|                   |                                              |           |                                     |
|-------------------|----------------------------------------------|-----------|-------------------------------------|
| Terrance Chua, MD | Nasrul Ismail<br>Min Tun Kyaw<br>Deborah Yip | Singapore | National Heart Centre Singapore (1) |
|-------------------|----------------------------------------------|-----------|-------------------------------------|

**Brazil (13)**

Lead Country Cardiologist  
Renato D. Lopes, MD, PhD  
Lead Country Nephrologists  
Maria Eugenia Canziani, MD (Lead)  
Sergio Draibe, MD (Co-Lead)

|                                                                                                                                           |                         |           |                                                     |
|-------------------------------------------------------------------------------------------------------------------------------------------|-------------------------|-----------|-----------------------------------------------------|
| Whady Hueb, MD<br>Eduardo Gomes Lima, MD<br>Paulo Cury Rezende, MD<br>Expedito Eustáquio Ribeiro Silva, MD<br>Alexandre Ciappina Hueb, MD | Myrthes Emy Takiuti, RN | Sao Paulo | Heart Institute (InCor) University of São Paulo (6) |
|-------------------------------------------------------------------------------------------------------------------------------------------|-------------------------|-----------|-----------------------------------------------------|

|                                                                                              |                        |          |                       |
|----------------------------------------------------------------------------------------------|------------------------|----------|-----------------------|
| Marianna D. A. Dracoulakis, MD, PhD<br>Rodolfo G. S. D Lima, MD<br>Paulo Novis Rocha, MD (N) | Natalia S Oliveira, RN | Salvador | Hospital da Bahia (5) |
|----------------------------------------------------------------------------------------------|------------------------|----------|-----------------------|

|                                                                                                                                                                                                                                       |                                                                                                                                |              |                                              |
|---------------------------------------------------------------------------------------------------------------------------------------------------------------------------------------------------------------------------------------|--------------------------------------------------------------------------------------------------------------------------------|--------------|----------------------------------------------|
| Alexandre Schaan de Quadros, MD<br>Renato Abdala Karam Kalil, MD<br>José Luiz da Costa Vieira, MD<br>Gabriel Grossmann, MD<br>Pedro Píccaro de Oliveira, MD<br>Leonardo Bridi, MD<br>Simone Savaris, MD<br>Renato George Eick, MD (N) | Aline Peixoto Deiro<br>Alice Manica Muller<br>Maria Antonieta Pereira de Moraes<br>Bruna Maria Ascoli<br>Sílvia Zottis Poletti | Porto Alegre | Instituto de Cardiologia de Porto Alegre (1) |
|---------------------------------------------------------------------------------------------------------------------------------------------------------------------------------------------------------------------------------------|--------------------------------------------------------------------------------------------------------------------------------|--------------|----------------------------------------------|

|                                                                   |                              |           |                                              |
|-------------------------------------------------------------------|------------------------------|-----------|----------------------------------------------|
| Paola Emanuela Poggio Smanio, MD, PhD<br>Leda Lotaif, MD, PhD (N) | Leonardo Pizzol Caetano, PhD | São Paulo | Instituto Dante Pazzanese de Cardiologia (1) |
|-------------------------------------------------------------------|------------------------------|-----------|----------------------------------------------|

**Hungary (12)**

Lead Country Cardiologist  
Andras Vertes, MD  
Lead Country Nephrologist  
Peter Voros, MD

|                                                       |                                                               |          |                                                         |
|-------------------------------------------------------|---------------------------------------------------------------|----------|---------------------------------------------------------|
| Andras Vertes, MD<br>Peter Voros, MD (N)              | Judit Sebo, MD<br>Zoltan Davidovits, MD<br>Laszlong Matics    | Budapest | Eszszk- Szent Istvan Hospital<br>(10)                   |
| Bela Merkely, MD, PhD, DSc<br>Mihaly Tapolyai, MD (N) | Andrea Bartykowszki, MD<br>Pal Maurovich-Horvat, MD, PhD, MPH | Budapest | Heart and Vascular Center,<br>Semmelweis University (1) |
| Albert Varga, MD, PhD<br>Timea Boros, MD (N)          | Gergely Agoston, MD                                           | Szeged   | University of Szeged (1)                                |

**Lithuania (12)**

Lead Country Cardiologist  
Jelena Celutkiene, MD  
Lead Country Nephrologist  
Marius Miglinas, MD, PhD

|                                                                                 |                                                                                                                                                                                                          |         |                                                        |
|---------------------------------------------------------------------------------|----------------------------------------------------------------------------------------------------------------------------------------------------------------------------------------------------------|---------|--------------------------------------------------------|
| Aleksandras Laucevicius, MD<br>Jelena Celutkiene, MD<br>Marius Miglinas, MD (N) | Agne Juceviciene, MD<br>Irma Kalibataite-<br>Rutkauskiene, MD<br>Laura Keinaite<br>Monika Laukyte<br>Gelmina Mikolaitiene<br>Akvile Smigelskaite, MD<br>Ilona Tamasauskiene,<br>MD<br>Agne Urboniene, MD | Vilnius | Vilnius University Hospital<br>Santariskes Clinic (12) |
|---------------------------------------------------------------------------------|----------------------------------------------------------------------------------------------------------------------------------------------------------------------------------------------------------|---------|--------------------------------------------------------|

**Portugal (10)**

Lead Country Cardiologist  
Ruben Ramos, MD  
Lead Country Nephrologist  
Fernando Nolasco, PhD

|                                                                                                                                                                     |                                                 |        |                                                        |
|---------------------------------------------------------------------------------------------------------------------------------------------------------------------|-------------------------------------------------|--------|--------------------------------------------------------|
| Ruben Ramos, MD<br>Duarte Cacula, MD<br>Ana Santana, MD<br>Antonio Fiarresga, MD<br>Lidia Sousa, MD<br>Hugo Marques, MD<br>Lino Patricio, MD<br>Luis Bernarndes, MD | Mafalda Selas<br>Filipa Silva<br>Cláudia Freixo | Lisbon | Hospital de Santa Marta /<br>Hospital Curry Cabral (8) |
|---------------------------------------------------------------------------------------------------------------------------------------------------------------------|-------------------------------------------------|--------|--------------------------------------------------------|

Pedro Rio, MD  
 Ramiro Carvalho, MD  
 Rui Ferreira, MD  
 Tiago Silva, MD  
 Ines Rodrigues, MD  
 Pedro Modas, MD  
 Guilherme Portugal, MD  
 Jose Fragata, MD  
 Marina Vieira, MD  
 Fernando Nolasco, PhD (N)  
 Marina Vieira., MD  
 Fernando Caeiro, MD

---

|                                |                            |         |                                                        |
|--------------------------------|----------------------------|---------|--------------------------------------------------------|
| Pedro Farto e Abreu, MD        | Maura Carina Nédio,<br>BSc | Amadora | Hospital Professor Doutor<br>Fernando Fonseca, EPE (1) |
| Sérgio Bravo Baptista, MD, PhD |                            |         |                                                        |
| Miguel Borges Santos, MD       |                            |         |                                                        |
| Patricia Carrilho, MD (N)      |                            |         |                                                        |

---

|                                |                                      |        |                                                                        |
|--------------------------------|--------------------------------------|--------|------------------------------------------------------------------------|
| Fausto J. Pinto, PhD           | Inês Zimbarra Cabrita,<br>PhD        | Lisbon | Santa Maria University Hospital,<br>Cardiology Department, CHLN<br>(1) |
| Miguel Nobre Menezes, MD       | Andreia Rocha, MSc                   |        |                                                                        |
| Guilhermina Cantinho Lopes, MD | Francisca Patuleia<br>Figueiras, PhD |        |                                                                        |
| Ana Gomes Almeida, PhD         | Andreia Coelho, BSc                  |        |                                                                        |
| Pedro Canas Silva, MD          | Marta Capinha                        |        |                                                                        |
| Angelo Nobre, MD               | Maria Inês Caetano                   |        |                                                                        |
| Ana Rita Francisco, MD         | Susana Silva                         |        |                                                                        |
| Jose Lopes, MD (N)             |                                      |        |                                                                        |

**Spain (9)**

Lead Country Cardiologist  
 Almudena Castro, MD  
 Lead Country Nephrologist  
 Rafael Selgas, MD

---

|                            |                                       |        |                             |
|----------------------------|---------------------------------------|--------|-----------------------------|
| Jose Lopez-Sendon, MD, PhD | Virginia Fernández-<br>Figares, Pharm | Madrid | Hospital La Paz. IdiPaz (6) |
| Almudena Castro, MD        |                                       |        |                             |
| Elena Refoyo Salicio, MD   |                                       |        |                             |
| Gabriela Guzman, MD        |                                       |        |                             |
| Gabriel Galeote, MD        |                                       |        |                             |
| Silvia Valbuena, MD        |                                       |        |                             |

Rafael Selgas, MD (N)

---

|                                 |                                 |          |                                                                                                                                                      |
|---------------------------------|---------------------------------|----------|------------------------------------------------------------------------------------------------------------------------------------------------------|
| Jesús Peteiro, MD, PhD          | Moisés Blanco-Calvo, PhD        | A Coruna | Complejo Hospitalario Universitario A Coruña (CHUAC) Sergas, Department of Cardiology. INIBIC A Coruña. CIBER-CV. Universidad de A Coruña, Spain (2) |
| María Dolores Martínez-Ruiz, MD | Encarnación Alonso-Álvarez, BSc |          |                                                                                                                                                      |
| Ruth Pérez-Fernández, MD        | Paula García-González, BSc      |          |                                                                                                                                                      |
| José J Cuenca-Castillo, MD      |                                 |          |                                                                                                                                                      |
| Xacobe Flores-Ríos, MD          |                                 |          |                                                                                                                                                      |
| Óscar Prada-Delgado, MD         |                                 |          |                                                                                                                                                      |
| Gonzalo Barge-Caballero, MD     |                                 |          |                                                                                                                                                      |
| Miguel Perez Fontan, MD (N)     |                                 |          |                                                                                                                                                      |

---

|                               |                  |          |                                                |
|-------------------------------|------------------|----------|------------------------------------------------|
| Vicente Miro, MD              | Begoña Igual, MD | Valencia | Hospital Universitario y Politecnico La Fe (1) |
| Jose L Diez, MD               |                  |          |                                                |
| Pilar Calvillo, MD            |                  |          |                                                |
| Julio Hernandez Jaras, MD (N) |                  |          |                                                |

---

**Argentina (6)**

Lead Country Cardiologist  
Luis Guzman, MD  
Lead Country Nephrologist  
Rafael Maldonado, MD

---

|                          |                    |         |                                     |
|--------------------------|--------------------|---------|-------------------------------------|
| Mariano Rubio, MD        | Graciela Scaro, MD | Cordoba | Clínica Privada Vélez Sarsfield (5) |
| Rafael Maldonado, MD (N) |                    |         |                                     |

---

|                           |                      |                                 |                        |
|---------------------------|----------------------|---------------------------------|------------------------|
| Julio César Figal, MD     | Matías Nicolás Mungo | Ciudad Autónoma de Buenos Aires | Fundación Favaloro (1) |
| Oscar Méndiz, MD          |                      |                                 |                        |
| Claudia Cortés, MD        |                      |                                 |                        |
| Roberto René Favaloro, MD |                      |                                 |                        |
| Pablo Raffaele, MD (N)    |                      |                                 |                        |

---

**France (6)**

Lead Country Cardiologist  
Emmanuel Sorbets, MD, PhD  
Lead Country Nephrologist

Eric Daugas, MD, PhD

|                                                                                                               |                                            |       |                     |
|---------------------------------------------------------------------------------------------------------------|--------------------------------------------|-------|---------------------|
| Philippe Gabriel Steg, MD<br>Jean-Michel Juliard, MD<br>Eric Daugas, MD, PhD (N)<br>Emmanuel Sorbets, MD, PhD | Helene Abergel, MSc<br>Axelle Fuentes, MSc | Paris | Bichat Hospital (4) |
|---------------------------------------------------------------------------------------------------------------|--------------------------------------------|-------|---------------------|

---

|                                                                                                        |                                                                                            |          |                        |
|--------------------------------------------------------------------------------------------------------|--------------------------------------------------------------------------------------------|----------|------------------------|
| Christophe Thuaire, MD<br>Téodora Dutoiu, MD<br>Catherine Albert, MD (N)<br>Bougrida Hammouche, MD (N) | Corine Thobois, RN<br>Emilie Tachot, RN<br>Christophe Laure, RN<br>Christel Vassaliere, RN | Chartres | C.H. Louis Pasteur (2) |
|--------------------------------------------------------------------------------------------------------|--------------------------------------------------------------------------------------------|----------|------------------------|

---

**New Zealand (6)**

Lead Country Cardiologist  
Gerard Patrick Devlin, MD  
Lead Country Nephrologist  
Peter Sizeland, MD

|                                                                          |                                                           |          |                      |
|--------------------------------------------------------------------------|-----------------------------------------------------------|----------|----------------------|
| Gerard Patrick Devlin, MD<br>Raewyn Fisher, MD<br>Peter Sizeland, MD (N) | Liz Low, RN<br>Jayne Scales, RN<br>Kirsty Abercrombie, RN | Hamilton | Waikato Hospital (6) |
|--------------------------------------------------------------------------|-----------------------------------------------------------|----------|----------------------|

**United Kingdom (5)**

Lead Country Nephrologist  
David Wheeler, MD

|                                                                                                                                                                                                                                                                                                                                   |                                                                                                                                                                                                                                                                                    |        |                                                                       |
|-----------------------------------------------------------------------------------------------------------------------------------------------------------------------------------------------------------------------------------------------------------------------------------------------------------------------------------|------------------------------------------------------------------------------------------------------------------------------------------------------------------------------------------------------------------------------------------------------------------------------------|--------|-----------------------------------------------------------------------|
| Roxy Senior, MBBS, MD, DM<br>Ahmed Elghamaz, MB BCh<br>Sothinathan Gurunathan, MBChB<br>Nikolaos Karogiannis, MBBS<br>Benoy N Shah, MD, MBBS, BSc (Hons)<br>Richard HJ Trimlett, MBBS, CCST<br>Michael B Rubens, LRCP, MRCS, MBBS, DMRD<br>Edward D Nicol, MD, BMedSci, MBBS, DTM&H<br>Tarun K Mittal, MD<br>Neill Duncan, MD (N) | Grace M. Young, MSc, BSc (Hons)<br>Christopher Kinsey<br>Raisa Kavalakkat, MSc, BSc, RN<br>Jo Evans, RN<br>Ikraam Hassan, RN<br>Emma Howard, MSc, BSc<br>Ann Banfield, BSc, RN<br>Reinette Hampson, BSc (Hons), BA (Hons)<br>Rory Collins, BSc<br>Anastasia Vamvakidou, MBBS, MRCP | Harrow | Northwick Park Hospital Harrow/<br>Royal Brompton Hospital London (2) |
|-----------------------------------------------------------------------------------------------------------------------------------------------------------------------------------------------------------------------------------------------------------------------------------------------------------------------------------|------------------------------------------------------------------------------------------------------------------------------------------------------------------------------------------------------------------------------------------------------------------------------------|--------|-----------------------------------------------------------------------|

|                                                                          |                                                                             |            |                                               |
|--------------------------------------------------------------------------|-----------------------------------------------------------------------------|------------|-----------------------------------------------|
| Reto Andreas Gamma, MBBS<br>Sumith Abeygunasekara, MD (N)                | Sarah Williams, RN<br>Kim Holland, RN<br>Karen Swan, RN                     | Chelmsford | Broomfield Hospital (1)                       |
| Khaled Alfakih, MBBS, MD<br>Jonathan Byrne, PhD<br>Ian Webb, PhD, MA (N) | Abigail Knighton, BSc.,<br>PG Dip.<br>Katherine Martin, RGN,<br>Dip. N, MSc | London     | King's College NHS Foundation<br>Hospital (1) |
| Dwayne S. G. Conway, MD                                                  | Judith Wright<br>Donna Exley                                                | Wakefield  | Pinderfields Hospital (1)                     |

#### **Serbia (5)**

Lead Country Cardiologist  
Branko D. Beleslin, MD, PhD  
Lead Country Cardiologist  
Sanja Simic Ogrizovic, MD

|                                                                                      |                                     |          |                                                                                                     |
|--------------------------------------------------------------------------------------|-------------------------------------|----------|-----------------------------------------------------------------------------------------------------|
| Branko D. Beleslin, MD, PhD                                                          |                                     | Belgrade | Faculty of Medicine, University of<br>Belgrade; Cardiology Clinic,<br>Clinical Center of Serbia (5) |
| Nikola N. Boskovic, MD                                                               | Ana D. Djordjevic-Dikic,<br>MD, PhD |          |                                                                                                     |
| Marija T. Petrovic, MD                                                               | Vojislav L. Giga, MD,<br>PhD        |          |                                                                                                     |
| Milan R. Dobric, MD                                                                  | Jelena J. Stepanovic,<br>MD, PhD    |          |                                                                                                     |
| Zeljko Z. Markovic, MD, PhD<br>Ana S. Mladenovic, MD, PhD<br>Sanja Ogrizovic, MD (N) |                                     |          |                                                                                                     |

#### **Australia (4)**

Lead Country Cardiologist  
Joseph B. Selvanayagam, MBBS (Hons), Dphil  
Lead Country Cardiologist  
Magid Fahim, MBChB,  
FRACP

|                                                                            |                                                                                                                       |                     |           |                                                                       |
|----------------------------------------------------------------------------|-----------------------------------------------------------------------------------------------------------------------|---------------------|-----------|-----------------------------------------------------------------------|
| <b>Austria (4)</b><br>Lead Country Cardiologist<br>Herwig Schuchlenz       | Joseph B. Selvanayagam, MBBS(Hons), DPhil                                                                             | Sau Lee, PhD        | Adelaide  | Flinders Medical Centre and College of Medicine and Public Health (4) |
|                                                                            | Majo X. Joseph, MBBS<br>Jonathan M Gleadle, BM Dphil (N)                                                              | Prince Thomas, RN   |           |                                                                       |
|                                                                            | Herwig Schuchlenz, MD<br>Stefan Weikl, MD                                                                             | Gudrun Steinmaurer  | Graz      | LKH Graz West Austria (3)                                             |
| <b>Belgium (4)</b><br>Lead Country Nephrologist<br>Kathleen Claes, MD, PhD | Irene Marthe Lang, MD                                                                                                 | Max-Paul Winter, MD | Vienna    | Medical University of Vienna, Department of Cardiology (1)            |
|                                                                            | Kaatje Goetschalckx, MD<br>Frans Van de Werf, PhD, MD<br>Kathleen Claes, MD, PhD (N)                                  | Valerie Robesyn     | Leuven    | University Hospital Leuven (3)                                        |
| <b>Israel (4)</b>                                                          | Christiaan Vrints, MD                                                                                                 | Nathalie Brosens    | Edegem    | Universitair Ziekenhuis Antwerpen (1)                                 |
|                                                                            | Bharati Shivalkar, MD<br>Amaryllis Van Craenenbroeck, MD (N)                                                          |                     |           |                                                                       |
|                                                                            | Yaron Arbel, MD                                                                                                       | Daniela Puzhevsky   | Tel Aviv  | Tel Aviv Sourasky Medical Center (4)                                  |
| <b>Egypt (3)</b>                                                           | Doron Schwartz, MD (N)<br>Orit Kliuk, MD                                                                              | Miri Revivo         |           |                                                                       |
|                                                                            | Magdy Abdelhamid, MD<br>Ahmed Kamal, MsC<br>Hossam Mahrous, MD<br>Mohamed Adel , MsC<br>Hussien El Fishawy, MD (N)    | Ahmed Talaat, MD    | Cairo     | Cairo University (3)                                                  |
| <b>United Arab Emirates (2)</b>                                            | Wael A. Almahmeed, MD<br>Mohamed Hassan, MD (N)<br>Seema Nour, MD<br>Abdallah M. Abdallah, MD<br>Salamah Alfalahi, MD | Virendra Misra, MD  | Abu Dhabi | Sheikh Khalifa Medical City (2)                                       |

**Germany (1)**

Lead Country Cardiologist  
Rolf Doerr, MD

Rolf Doerr, MD

Karin Ploetze, PhD

Dresden

Praxisklinik Herz und Gefaesse  
(1)

Gregor Simonis, MD, PhD  
Juergen Stumpf, MD  
Clemens T. Kadalie, MD  
Klaus Matschke, MD, PhD  
Doreen Reimann, MD (N)

Franziska Guenther  
Kerstin Bonin  
Kerstin Mikes, RN  
Katharina Knaut

**Macedonia (1)**

Sasko Kedev, MD, PhD  
Irena Peovska Mitevska, MD, PhD  
Elizabeta Srbinovska Kostovska, MD, PhD  
Hristo Pejkov, MD, PhD  
Zvezdana Petronijevic, MD (N)  
Liljana Tozija, MD (N)

Skopje

University Clinic of Cardiology (1)

**Netherlands (1)**

Robert K. Riezebos, MD, PhD

Amsterdam

Cardio Research Hartcentrum  
OLVG (1)

Pouneh Samadi, MD

Jeannette, J. M. Schoep,  
RN  
Elisabeth, M. Janzen,  
RN

Elise van Dongen, MD

Sander R. Niehe, MD  
Yves Smets, MD (N)

**Romania (1)**

Calin Pop, MD, PhD

Bucharest

Emergency County Hospital Baia  
Mare (1)

Matei Claudia, MD, PhD  
Florina Chereches, MD (N)

**Sweden (1)**

Lead Country Cardiologist  
Claes Held, MD, PhD

Claes Held, MD, PhD  
Axel Åkerblom, MD, PhD  
Inga Soveri, MD, PhD (N)

Christina Björklund, RN  
Maria Andreasson, RN

Uppsala

Uppsala University (1)

\* (N) = Nephrologist



### III. Supplementary Methods

#### Required Quality Metrics for Participating Sites

Sites qualifying (criteria below) and participating in ISCHEMIA were considered for ISCHEMIA-CKD (majority of sites). In addition, sites with the potential to enroll advanced CKD participants were considered for the trial even if they did not participate in ISCHEMIA (minority of sites- 15 such sites randomized at least 1 participant). Identification of a lead nephrologist was encouraged for every site participating in ISCHEMIA-CKD.

1. PCI site and operator requirements are as follows:
  - a. PCI Site Criteria
    - i. Must be willing to establish an ISCHEMIA-CKD trial HEART KIDNEY TEAM of cardiovascular interventionalists, cardiologist, cardiovascular surgeons and nephrologist that can evaluate randomized patients on an ongoing basis in a collaborative, multidisciplinary fashion
    - ii. Average number of annual PCI cases over the last 3 years for the primary PCI location  $\geq 400$ /year
    - iii. Excluding cases with total occlusion and STEMI:
      1. Average procedural success rate over the last 3 years  $> 95\%$ :
      2. Average rate of emergency CABG over the last 3 years  $< 0.6\%$ :
      3. Average rate of in-hospital mortality over the last 3 years  $< 1.5\%$
  - b. PCI Operator Criteria
    - i. Average number of annual PCI cases for the operator over the last 3 years  $\geq 75$  cases/year. If the volume is  $< 75$  per year, total number of lifetime PCI cases must be  $> 1500$  cases:
4. CABG Site and Operator requirements are as follows:
  - a. CABG Site Criteria
    - i. Average annual total procedures with CABG over the last 3 years  $\geq 125$ /year
    - ii. Average annual cardiac surgical procedures (open heart) over the last 3 years  $\geq 300$ /year
    - iii. AND [either 1, 2 or 3]
      1. Non-risk adjusted in-hospital mortality for all isolated CABG procedures over the last 3 years  $\leq 3.0\%$
      2. Non-risk adjusted in-hospital mortality for isolated elective CABG procedures over the last 3 years  $\leq 2.0\%$
      3. (For US Sites participating in STS Registry): Risk adjusted operative mortality for isolated CABG procedures over the last 3 years  $\leq 2.7\%$
  - b. CABG Operator Criteria:
    - i. Average number of annual total procedures with CABG for the surgeon over the last 3 years  $\geq 75$  cases/year
    - ii. Lifetime total procedures with CABG  $\geq 750$  cases

Sites that qualified for participation in the EXCEL trial<sup>1</sup> qualified for participation in ISCHEMIA. [1Stone GW, Sabik JF, Serruys PW, et al. Everolimus-Eluting Stents or Bypass Surgery for Left Main Coronary Disease. N Engl J Med 2017;376:1089.]

## Guidelines for Revascularization Therapy

The guidelines for revascularization therapy were similar to that of ISCHEMIA. Revascularization therapy will be performed based on findings from the diagnostic catheterization as well as other relevant clinical information. The goal is revascularization of all ischemic myocardial segments (detected by non-invasive imaging or by fractional flow reserve (FFR) testing in the catheterization laboratory). The choice of revascularization strategy will be based on anatomy and contemporaneous guideline recommendations, determined by investigators at the enrolling sites. It is recommended that the study Heart-Kidney Team (interventional cardiologist, cardiac surgeon, cardiologist and nephrologist) discuss each case (as applicable) after diagnostic angiography to reach a consensus as to the best revascularization technique.

### Fractional Flow Reserve Use Algorithm

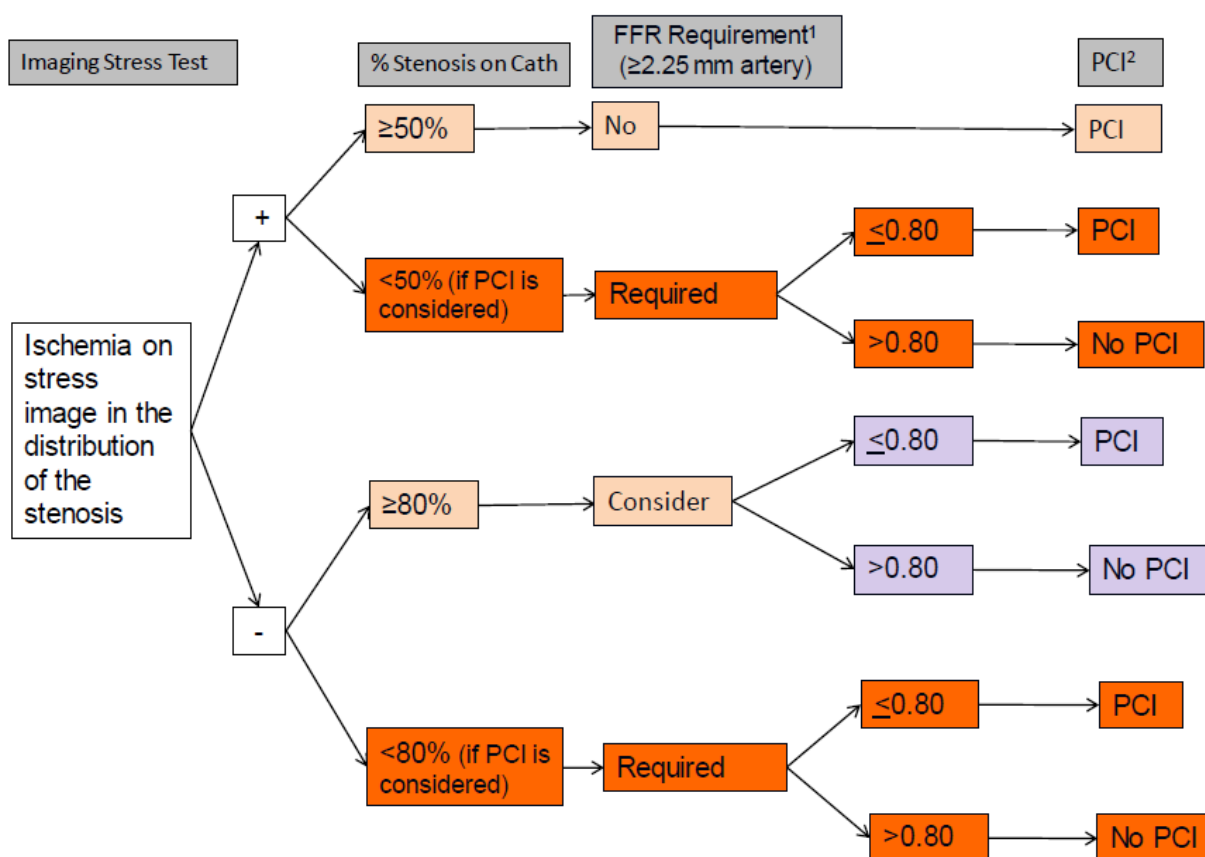

<sup>1</sup>The use of instantaneous wave-free ratio (iFR) instead of FFR (where available) was permitted, using a cutoff of  $\leq 0.89$  for physiologic significance.  
<sup>2</sup>PCI based on anatomic feasibility and clinical considerations

## For ETT Participants

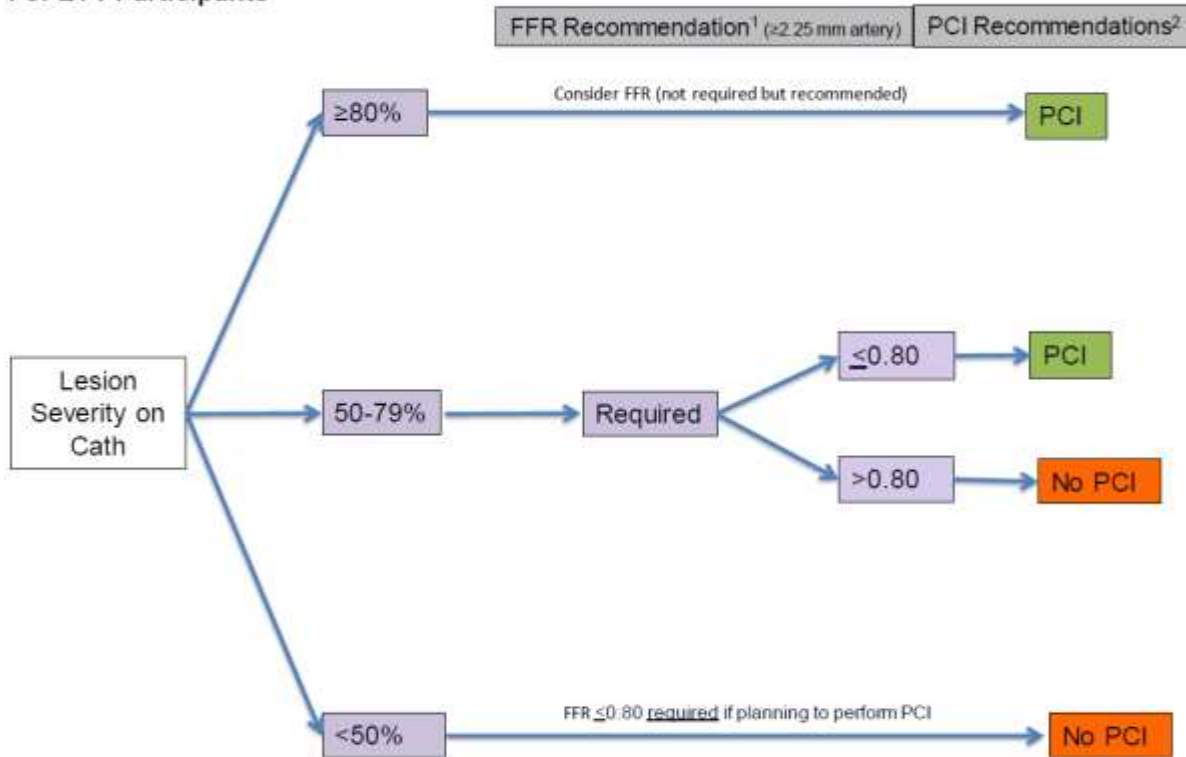

<sup>1</sup>The use of instantaneous wave-free ratio (iFR) instead of FFR (where available) was permitted, using a cutoff of  $\leq 0.89$  for physiologic significance.

<sup>2</sup>PCI based on anatomic feasibility and clinical considerations

## Strategies to minimize contrast induced acute kidney injury after cardiac catheterization/PCI

- Pre-, intra- and post-procedure hydration
  - Protocol used in the POSEIDON trial:
    - Initiate 3mL/kg/h of normal saline (NaCl 0.9%) IV, for at least 1 hour prior to angiography
    - Measure LVEDP prior to contrast administration
    - Adapt infusion rate based on LVEDP measurement as follows:
      - 5 mL/kg/hr for LVEDP  $< 13$  mm Hg
      - 3 mL/kg/hr for LVEDP of 13 mm Hg to 18 mm Hg
      - 1.5 mL/kg/hr for LVEDP  $> 18$  mm Hg
    - Continue fluid administration for 4 hours post procedure
  - Simplified protocol based on LVEF (expert opinion):
    - Participants with preserved EF
      - IV 0.9% NS at 1 cc/kg/hour for 12 hours pre- and post-procedure
  - Participants with EF  $< 40\%$

- 
- IV 0.45% NS at cc/cc replacement (urine output should be match to maintain euvolemic state) for 12 hours pre- and post-procedure
  - Pre-procedure high dose statins
  - Avoid nephrotoxic agents for at least 48 hours prior
  - Use iso- or low-osmolar contrast agents
  - Limit contrast used: Ultra-low/Zero volume contrast techniques (IVUS guided PCI)
    - Use small diameter catheters (i.e., 5–6 French) without side-holes
    - All contrast injections require simultaneous cine angiogram, i.e., “no dye without the cine’s eye.”
    - Limit the volume of contrast injected from the catheter to 1–2 cm<sup>3</sup> per injection using a 3-cm<sup>3</sup> syringe.
    - During PCI, prior to exchange of devices such as balloon catheters, remove contrast from the guide catheter by back bleeding contrast out of the “Y” connector.
    - If available, display previous angiographic images (including angiography from past procedures) alongside active fluoroscopy screen as a reference to use as guidance during guide wire, balloon, stent and ultrasound passage.
    - Absolutely no contrast “puffing”/test injections during the procedure.
    - Use IVUS liberally for pre-PCI assessment of the lesion, selection of therapeutic modalities, and post-PCI result assessment.
    - Avoid ventriculography
    - Use of biplane if available
  - Consider ischemia-guided revascularization
  - Consider staged PCI for complex multivessel disease

---

IV= intravenous; IVUS= intravascular ultrasound; LVEDP= left ventricular end diastolic pressure; LVEF= left ventricular ejection fraction; PCI= percutaneous coronary intervention

### **Strategies to minimize acute kidney injury after CABG**

---

Consider delay of surgery  $\geq 7$  days from time of cardiac catheterization

Use of off pump CABG may be reasonable

Renally dose all medications

In patients undergoing on pump CABG, maintain perioperative hematocrit > 19% and mean arterial pressure > 60 mmHg

---

CABG= coronary artery bypass graft surgery

## Guidelines for Medical Therapy

Medical therapy for participants in the ISCHEMIA-CKD will consist of intensive, comprehensive secondary prevention with lifestyle and pharmacologic intervention applied equally to both treatment groups. The minimum goals of medical therapy will be those recommended by the American College of Cardiology (ACC), American Heart Association (AHA), the European Society of Cardiology (ESC) for secondary prevention and angina management, the National Kidney Foundation and the UK renal association.

There are challenges as the evidence on which the guidelines are based for those with advanced chronic kidney disease (CKD) and especially those on dialysis is weak at best, as most randomized trials exclude these high-risk subsets. Consequently, most of the national and international guidelines base their recommendations for secondary prevention on cohorts without CKD. These are the existing standards and will be used in the ISCHEMIA-CKD trial with some modification, as outlined below.

### General Considerations:

The medical management of stable ischemic heart disease (SIHD) patients with advanced CKD, including patients on dialysis, should follow that of the general population. In particular, patients should receive aspirin (ASA), beta-blockers, nitroglycerin, angiotensin converting enzyme (ACE) inhibitors or angiotensin receptor blockers (ARB), statins, and calcium-channel blockers (CCB) as indicated.

- Dose adjustments are required for medications that are renally excreted or dialyzed.
- In patients with difficult-to-control hypertension, the dialyzability of antihypertensive medications should be considered.
- Patients on dual antiplatelet therapy should be monitored more carefully for increased risk of bleeding.
- Diagnosis, evaluation, prevention and treatment (including diet and medications) of CKD-mineral and bone disorders should be based on local practice and in accordance with national and international guidelines.
- Evaluation and treatment of anemia associated with CKD should be based on local practice and in accordance with national and international guidelines.

## Goals of Medical Therapy

| Risk Factor       | Goals                                           |
|-------------------|-------------------------------------------------|
| <b>Behavioral</b> |                                                 |
| Smoking           | Smoking cessation                               |
| Physical activity | ≥30 minutes of moderate intensity ≥5 times/week |
| Saturated fat     | <7% calories                                    |

---

**Physiological**

|                                      |                                                                                                    |                                                         |
|--------------------------------------|----------------------------------------------------------------------------------------------------|---------------------------------------------------------|
| Blood pressure                       | <130/80 mm Hg <sup>1</sup><br>Significantly lower BP (e.g., <110 mm Hg systolic) should be avoided |                                                         |
| LDL cholesterol                      | LDL-C <70 mg/dl (1.8 mmol/L)                                                                       |                                                         |
| Body Mass Index (kg/m <sup>2</sup> ) | Initial BMI<br>25-27.5<br>>27.5                                                                    | Weight Loss Goal<br>BMI <25<br>10% relative weight loss |
| Diabetes                             | HbA1c <8%                                                                                          |                                                         |

**Pharmacological agents<sup>2</sup>      Indications**

|                           |                                                                                                                                                                                                                                           |
|---------------------------|-------------------------------------------------------------------------------------------------------------------------------------------------------------------------------------------------------------------------------------------|
| Aspirin                   | 75-162 mg daily                                                                                                                                                                                                                           |
| Statin                    | Pre-dialysis: Maximum tolerated dose of high-intensity statin (atorvastatin 40-80 mg or rosuvastatin 20-40 mg)<br>Dialysis: Maximum tolerated dose of moderate- or high-intensity statin (atorvastatin 20-80 mg or rosuvastatin 10-40 mg) |
| ACEi/ARB                  | All participants (as tolerated)                                                                                                                                                                                                           |
| Beta blocker              | Use for history of MI or LVEF <40%                                                                                                                                                                                                        |
| P2Y12 receptor antagonist | Use for participants with contraindication to aspirin;<br>In combination with aspirin for participants who receive PCI (duration depends on BMS vs. DES); post-MI/ACS for 1 year                                                          |
| Ezetimibe                 | Use for participants unable to reach LDL-C goal on maximally tolerated statin dose                                                                                                                                                        |

---

<sup>1</sup>This risk factor goal was changed in April 2018. Prior goal was <140/90 mm Hg in participants without proteinuria and for participants on dialysis, and a goal of <130/80 mm Hg in participants with proteinuria (>300mg/day).

<sup>2</sup>Dose adjustments are required for medications that are renally excreted or dialyzed  
BMI = body mass index; HbA1c = hemoglobin A1c; MI = myocardial infarction; ACEi/ARB = angiotensin converting enzyme inhibitor/angiotensin receptor blocker; eGFR = estimated glomerular filtration rate; LVEF = left ventricular ejection fraction; MI = myocardial infarction; PCI = percutaneous coronary intervention; BMS = bare metal stent; DES = drug-eluting stent; ACS = acute coronary syndrome; LDL-C = low-density lipoprotein cholesterol.

### ANGINA THERAPY

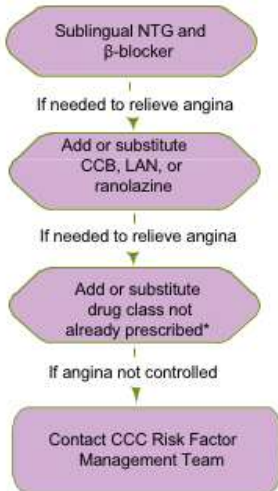

\*Consider (not in order of preference): ivabradine, nicorandil, perhexiline, trimetazidine, where approved. LAN=long-acting nitrate

### LIPID LOWERING THERAPY

Goal: LDLC <70mg/dL (1.8 mmol/L)

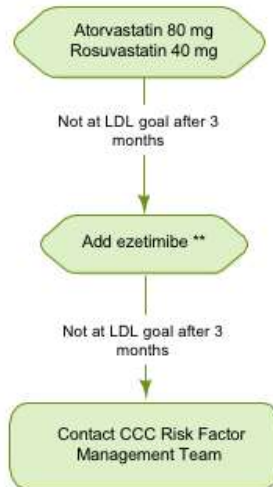

\*\*Where available

### HYPERTENSION THERAPY

Goal: Systolic BP <130 mmHg

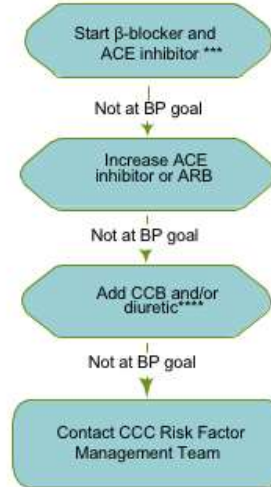

\*\*\*Or ARB if appropriate. Monitor serum potassium closely in participants not on dialysis

\*\*\*\*Loop diuretic preferred



## Definitions of Clinical Outcomes

### Death

All deaths will be adjudicated and classified as cardiovascular, non- cardiovascular or undetermined. Cardiovascular deaths are defined as all deaths excluding those for which the principal and underlying cause is solely non-cardiovascular. Any death for which a cardiovascular contributing cause is suspected will also be considered a cardiovascular death.

### Myocardial Infarction

Two versions of MI will be adjudicated in ISCHEMIA-CKD: a primary definition and secondary definition. Each definition includes a hierarchy of markers and threshold values as well as a set of rules for diagnosing MI when one or more key elements of the medical record are missing.

The Primary Definition is based upon the Universal Definition of MI, but relies upon site- reported MI decision limits for troponin (which may or may not be the same as the manufacturer 99%URL), and has selected unique marker criteria for MI after PCI or CABG (Type 4a, 5).

The Secondary Definition is also based upon the Universal Definition of Myocardial Infarction, but specifically uses the 99%URL from the assay manufacturer's package insert (which may or may not be the site's MI decision limit) and uses the same supporting criteria (eg. angiographic and ECG) as the UMI definition.

All MI events will be classified based on the Universal MI classification system as follows:

- Type 1: Spontaneous MI
- Type 2: Secondary MI
- Type 3: Sudden Death MI
- Type 4a: MI related to PCI
- Type 4b: MI related to stent thrombosis
- Type 4c: MI related to stent restenosis
- Type 5: MI related to CABG
- Silent MI

### ***Spontaneous MI (Types 1, 2, 4b, 4c)***

Diagnosis of spontaneous MI will be satisfied by a clinical setting consistent with acute myocardial ischemia and any one or more of the following criteria:

Marker elevation, as outlined below and at least 1 of the following:

- Symptoms of ischemia, usually lasting > 20 minutes in duration
- New ischemic ST and/or T wave and/or Q-wave ECG changes, or new LBBB, as described below
- Imaging evidence of new loss of viable myocardium in comparison to the baseline imaging test
- Angiographic evidence of intracoronary thrombus, stent thrombosis (4b) or high- grade in-stent restenosis ( $\geq 50\%$ ) (4c)

Marker data not available and at least 2 of the following:

- New ischemic ST and/or T wave and/or Q-wave ECG changes, or new LBBB, as described below
- Imaging evidence of new loss of viable myocardium in comparison to the baseline imaging test

- Angiographic evidence of intracoronary thrombus.

Autopsy evidence of a fresh myocardial infarction as stand-alone criterion

### ***Spontaneous MI Marker Criteria***

Troponin, including high-sensitivity troponin, is the preferred biomarker and takes precedence over CK-MB for both definitions.

Primary Definition: Preferentially uses a troponin threshold value reported as MI Decision Limit or the Upper Limit of Normal (ULN). Marker elevation is defined as troponin > ULN/MI decision limit. If troponin is not done or not available, then CK-MB > ULN will qualify. If both troponin and CK-MB are not done or not available, then CK > 2 x ULN will qualify.

Secondary Definition: Preferentially uses a troponin threshold reported by the manufacturer, namely, the manufacturer 99th percentile. Marker elevation is defined as troponin > 99th percentile. If the troponin 99th percentile is not reported, then troponin > ULN will qualify. If troponin is not done or not available, then CK-MB > ULN will qualify. If both troponin and CK-MB are not done or not available, then CK > 2 x ULN will qualify.

### ***Spontaneous MI ECG Criteria***

ECG criterion is considered to be met if any of the following:

ST elevation: New ST elevation at the J-point in two contiguous leads with the cutpoints:  $\geq 0.2$  mV in men >age 40 and  $\geq 0.25$  mV in men <40 years or  $\geq 0.15$  mV in women in leads V2–V3 and/or  $\geq 0.1$  mV in other leads, or new LBBB.

Any new Q-wave in leads V2–V3  $\geq 0.02$  seconds or QS complex in leads V2 and V3 or Q-wave  $\geq 0.03$  seconds and  $\geq 0.1$  mV deep or QS complex in leads I, II, aVL, aVF, or V4–V6 in any two leads of a contiguous lead grouping (I, aVL, V6; V4–V6; II, III, and aVF) or R-wave  $\geq 0.04$  seconds in V1–V2 and R/S  $\geq 1$  with a concordant positive T-wave in the absence of a conduction defect.

ST depression and/or T-wave changes, new horizontal or down-sloping ST depression  $\geq 0.05$  mV in two contiguous leads; and/or T-wave inversion  $\geq 0.1$  mV in two contiguous leads. The ST-T wave criteria only apply in the absence of findings that would preclude ECG analysis such as LBBB, LVH with repolarization abnormalities, pre-excitation and pacemakers.

### ***Silent MI***

This event includes evidence of new silent Q-wave MI detected during routine protocol or clinically obtained ECG follow-up. Silent MI events will be classified as a type 1 MI.

### ***Sudden death MI (Type 3)***

MI events in which a presentation consistent with infarction is present but the patient dies before the biomarkers are drawn or within the first few hours of the event before the biomarkers become positive. Sudden unexpected cardiac death, including cardiac arrest, often with symptoms suggestive of myocardial ischemia, accompanied by presumably new ST-segment elevation, or new LBBB, or evidence of fresh thrombus in a coronary artery by angiography and/or at autopsy, but death occurring before blood samples could be obtained, or at a time before the appearance of cardiac biomarkers in the blood.

### ***PCI-Related MI (Type 4a)***

#### **Primary Definition**

CK-MB is the preferred biomarker and takes precedence over troponin. For subjects with normal baseline biomarker level pre-PCI, peri-PCI MI requires a rise in CK-MB to >5-fold the ULN (or a rise in troponin to >35 times the MI Decision Limit/ULN, when CK-MB is unavailable) within 48 hours post-PCI. If pre-PCI cardiac markers (CKMB or cTn) are elevated, they must be stable or falling as indicated by two samples at least 6 h apart. The post-PCI CKMB level should reflect a rise of >20% over pre-PCI levels. In addition to biomarker criteria, peri-PCI MI requires at least one of the following:

- Post- procedure angiographic TIMI 0/1 flow in a major coronary artery or a side branch with reference vessel diameter  $\geq 2.0$  mm which had TIMI 2-3 flow at baseline, or TIMI 2 flow in a major coronary artery or a side branch with reference vessel diameter  $\geq 3.0$  mm which had TIMI 3 flow at baseline or Type C dissection (NHLBI classification) or greater in the target vessel.
- New ECG changes (ST segment elevation or depression  $>0.1$  mV in 2 contiguous leads), new pathologic Q-waves in  $\geq 2$  contiguous leads, or new persistent LBBB present on a post-PCI ECG obtained at least 30 minutes and up to 48 hours post procedure in the absence of any intervening coronary event between the time of the PCI procedure and the ECG showing changes.

NOTE: A type 4a MI will be diagnosed with a rise in CK-MB to >10-fold the ULN (or when CK-MB is unavailable, a rise in troponin to >70 times the MI Decision Limit/ULN) as a stand-alone criterion. If biomarkers are missing, a type 4a MI will be diagnosed if BOTH ECG criteria (new ST elevation or depression, Q-wave criteria, or new and persistent LBBB) AND angiographic criteria above are present. If pre-PCI cardiac markers are missing, they will be assumed to be normal in those without a preceding event.

### **Secondary Definition**

Elevation of troponin values  $>5 \times$  99th percentile URL within 48 hours post-PCI in patients with normal baseline troponin values pre-PCI AND a rise of troponin values  $>20\%$  if the baseline values are elevated pre-PCI and are stable or falling. If the troponin 99th percentile is not available, the MI Decision Limit / ULN may be used. If troponins are not available, CKMB elevation  $>5 \times$  ULN will be used.

In addition to biomarker criteria, peri-PCI MI requires at least one of the following:

- Symptoms suggestive of myocardial ischemia ( $\geq 20$  min)
- New ischemic ST changes or new pathological Q waves. (see “ECG Criteria” above) Note the UMI definition uses  $\geq 0.05$  mV of STD whereas the ISCHEMIA definition uses  $\geq 0.1$  mV for PCI related ECG criteria
- Angiographic evidence of a flow limiting complication, such as loss of patency of a side branch, persistent slow-flow or no re-flow, embolization, or Type C dissection (NHLBI classification) or greater in the target vessel.
- Imaging evidence of new loss of viable myocardium or new regional wall motion abnormality.

NOTE: A type 4a MI will be diagnosed with a rise in troponin to >70 times the 99th percentile URL (or, when troponin is unavailable, a rise in CK-MB to >10 times the ULN) as a stand-alone criterion. If biomarkers are missing, a type 4a MI will be diagnosed if BOTH ECG criteria (new ST elevation or depression, Q-wave criteria, or new and persistent LBBB) AND angiographic criteria above are present. If pre-PCI cardiac markers are missing, they will be assumed to be normal in those without a preceding event.

### ***CABG-Related MI (Type 5)***

#### **Primary Definition**

CK-MB is the preferred serum biomarker and takes precedence over cardiac troponin. For subjects with normal baseline biomarker level pre-CABG, peri-CABG MI requires a rise in CK-MB to >10-fold the ULN (or a rise in troponin to >70 times MI Decision Limit/ULN when CK-MB is unavailable) within 48 hrs post-CABG. In addition to biomarker criteria, peri-CABG MI requires at least one of the following:

- A new substantial wall motion abnormality by cardiac imaging (CEC assessed), except new septal and apical abnormalities. The CEC will have latitude in determining whether a new wall motion abnormality is “substantial” in the context of the clinical event.
- New pathologic Q-waves in  $\geq 2$  contiguous leads or new persistent LBBB is present on post CABG ECG obtained day 3 post CABG, or hospital discharge, whichever comes earlier in the absence of any intervening coronary event between the time of the CABG procedure and the ECG showing changes.

NOTE: A type 5 MI will be diagnosed with a rise in CK-MB to >15-fold the ULN (or when CK-MB is unavailable a rise in troponin to >100 times the MI Decision Limit/ULN) as a stand-alone criterion. If biomarkers are missing, an MI will be diagnosed if the ECG criteria (New pathologic Q waves or new persistent LBBB) AND new substantial wall motion abnormality are BOTH present. If pre-CABG cardiac markers are missing, they will be assumed to be normal in those without a preceding event.

#### **Secondary Definition**

Elevation of troponin values >10 X 99th percentile URL within 48 hrs post-CABG in patients with normal baseline troponin values ( $\leq$  99th percentile URL). If the troponin 99th percentile is not available, the ULN may be used. If troponins are not available, CKMB elevation >10 X ULN will be used. In addition to biomarker criteria, peri-CABG MI requires at least one of the following:

- New pathologic Q waves or new LBBB
- Angiographic evidence of new graft or new native coronary artery occlusion.
- Imaging evidence of new loss of viable myocardium.

NOTE: A type 5 MI will be diagnosed with a rise in troponin to >100 times the 99th percentile URL (or when troponin is unavailable a rise in CK-MB to >15 times the ULN) as a stand-alone criterion. If biomarkers are missing, an MI will be diagnosed if the ECG criteria (New pathologic Q waves or new persistent LBBB) AND new substantial wall motion abnormality are BOTH present. If pre-CABG cardiac markers are missing, they will be assumed to be normal in those without a preceding event.

#### ***Complicated MI and Large MI***

*Complicated MI:* Prognostically important MIs may also be identified as those with complications such as hemodynamic instability, cardiogenic shock, drop in EF >10% from baseline, electrical instability with life-threatening VT or VF, or heart failure complicating MI. Complicated myocardial infarctions may typically require ICU care, invasive support (eg. intubation, IABP, PA catheters) and intravenous medications (eg. inotropes or antiarrhythmics.) CEC adjudicators will identify complicated MIs based upon the information available to them in the eCRF and source documents.

- Hemodynamic instability: requiring fluids, inotropic or vasopressor support to maintain end-organ perfusion. May progress to shock if also accompanied by end-organ underperfusion.
- Shock: Compromise of end-organ perfusion due to hemodynamic instability and sustained hypotension. Often manifested by hypotension, increased creatinine, shock liver, and decreased mentation.
- Life-threatening VT or VF: Requiring antiarrhythmics or defibrillation to return sinus rhythm. Transient runs of VT (eg. during reperfusion) are not associated with hemodynamic instability are not usually considered life-threatening.
- Decreased EF  $\geq 10\%$ : EF assessment during the event which indicates a drop from prior assessments (eg. EF 30% from previous EF 55%)
- HF in the setting of an MI is defined on the basis of the physician's decision to treat HF with an intravenous (IV) diuretic, IV inotropic agent or IV vasodilator and at least 1 of the following:
  - Presence of pulmonary edema or pulmonary vascular congestion on chest radiograph believed to be of cardiac cause.
  - Rales greater than 1/3 up the lung fields believed to be due to HF.
  - Pulmonary Capillary Wedge Pressure (PCWP) or left ventricular end diastolic pressure (LVEDP) greater than 18 mmHg.
  - Dyspnea, with documented  $\text{paO}_2$  less than 80 mmHg on room air or  $\text{O}_2$  saturation less than 90% on room air, without significant lung disease

*Large MI:* The size of MI will be assessed by examining peak levels of cardiac biomarkers as a continuous function.

### **Hospitalization for Unstable Angina**

Prolonged ischemic symptoms at rest (usually  $\geq 10$  minutes in duration), or accelerating pattern of chest pain that occurs with a lower activity threshold (CCS class III or IV) considered to be myocardial ischemia upon final diagnosis resulting in an unscheduled visit to a healthcare facility resulting in an overnight stay generally within 24 hours of the most recent symptoms, cardiac biomarkers not meeting MI criteria, and at least one of the following:

- New or worsening ST or T wave changes on resting ECG\* (core laboratory assessed)
- Angiographic evidence of a ruptured/ulcerated plaque, or thrombus in an epicardial coronary artery believed to be responsible for the ischemic symptoms/signs (core laboratory assessed).

\*ECG Criteria:

ST segment shifts and T-wave changes: New horizontal or down-sloping ST depression  $\geq 0.05$  mV in two contiguous leads; and/or T inversion  $\geq 0.1$  mV in two contiguous leads, or new ST segment elevation  $\geq 0.1$  mV in 2 contiguous leads. The ST-T wave criteria only apply in the absence of findings that would preclude ECG analysis such as LBBB, LVH with repolarization abnormalities, pre-excitation and pacemakers.

### **Resuscitated Cardiac Arrest**

Resuscitated cardiac arrest is defined as successful resuscitation for documented cardiac arrest out-of-hospital (or ER) in a patient subsequently admitted to hospital, and then discharged. A patient who is successfully resuscitated but dies before hospital discharge of complications related to the cardiac arrest (e.g., anoxic encephalopathy, septic shock), will be classified as a coronary heart disease death. An uncomplicated procedure-related cardiac arrest with prompt

resuscitation and without adverse sequelae will not be counted as an event. Events that meet the MI criteria will be categorized as MI.

### **Hospitalization for Heart Failure**

While patients may have multiple simultaneous disease processes, for the end point event of heart failure requiring hospitalization, the diagnosis of congestive heart failure would need to be the primary process. Heart failure (HF) requiring hospitalization is defined as an event that meets the following criteria:

- a. Requires hospitalization defined as an admission to an inpatient unit or a visit to an emergency department that result in at least a 24 hour stay (or a date change if the time of admission/discharge is not available).

**AND**

- b. Clinical symptoms of heart failure, including at least one of the following: New or worsening
  - Dyspnea
  - Orthopnea
  - Paroxysmal nocturnal dyspnea
  - increasing fatigue/worsening exercise tolerance

**AND**

- c. Physical signs of heart failure, including at least two of the following:
  1. Edema (> 2+ lower extremity)
  2. Pulmonary rales (pulmonary edema not occurring as the consequence of an arrhythmia in the absence of worsening heart failure. If pulmonary edema complicates acute MI event should be coded as MI)
  3. Jugular venous distension
  4. Tachypnea (respiratory rate > 20 breaths/minute)
  5. Rapid weight gain
  6. S3 gallop
  7. Increasing abdominal distension or ascites
  8. Hepatojugular reflux
  9. Radiological evidence of worsening heart failure
  10. A right heart catheterization within 24 hours of admission showing a pulmonary capillary wedge pressure (pulmonary artery occlusion pressure)  $\geq$  18 mm Hg and/or a cardiac output < 2.2 L/min/m<sup>2</sup>

NOTE: Biomarker results (e.g., brain natriuretic peptide (BNP) > 500 or Pro-NT BNP > 2500) consistent with congestive heart failure will be supportive of this diagnosis, but the elevation in BNP cannot be due to other conditions such as cor pulmonale, pulmonary embolus, primary pulmonary hypertension, or congenital heart disease. Increasing levels of BNP, although not exceeding the ULN, may also be supportive of the diagnosis of congestive heart failure in selected cases (e.g. morbid obesity).

**AND**

- d. Need for additional/increased therapy

Initiation of, or an increase in, treatment directed at heart failure or occurring in a patient already receiving maximal therapy for heart failure and including at least one of the following:

1. Initiation of or a significant augmentation in oral therapy for the treatment of congestive heart failure
2. Initiation of intravenous diuretic, inotrope, or vasodilator therapy
3. Uptitration of intravenous therapy, if already on therapy
4. Initiation of mechanical or surgical intervention (mechanical circulatory support, heart transplantation or ventricular pacing to improve cardiac function), or the use of ultrafiltration, hemofiltration, or dialysis that is specifically directed at treatment of heart failure.

**AND**

- e. No other non-cardiac etiology (such as chronic obstructive pulmonary disease, hepatic cirrhosis, acute renal failure, or venous insufficiency) and no other cardiac etiology (such as pulmonary embolus, cor pulmonale, primary pulmonary hypertension, or congenital heart disease) for signs or symptoms are identified.

**Stroke**

Stroke is defined as the rapid onset of a new neurologic deficit attributed to an obstruction in cerebral blood flow and/or cerebral hemorrhage with no apparent non-vascular cause (eg. trauma, tumor, or infection). Available neuroimaging studies will be considered to support the clinical impression and to determine if there is a demonstrable lesion compatible with an acute stroke.

**Classification:**

**Transient Ischemic Attack**

A Transient Ischemic Attack is defined as an acute episode of focal cerebral, spinal, or retinal dysfunction caused by an ischemia of central nervous system tissue which resolves within 24 hrs and without neuroimaging evidence of acute infarction.

**Ischemic Stroke**

Ischemic stroke is defined as an acute episode of focal cerebral, spinal, or retinal dysfunction caused by an infarction of central nervous system tissue.

Signs/ symptoms  $\geq$  24 hrs regardless of neuroimaging findings:

Ischemic stroke can be defined clinically- by persistence of signs and symptoms  $\geq$  24 hrs, usually supported by evidence of infarction on neuroimaging (CT or MRI) although very early neuroimaging (usually with CT) may not demonstrate the infarction.

Signs/ symptoms < 24 hrs with neuroimaging evidence of infarction:

Ischemic stroke can be defined by neuroimaging- where neuroimaging (usually MRI diffusion weighted or flair images) confirms the presence of acute infarction even if signs/ symptoms resolve within 24hrs.

Patients admitted for an acute stroke treated with thrombolysis or interventions that have no residual neurologic symptoms after treatment will be classified as an ischemic stroke.

**Ischemic Stroke with Symptomatic Hemorrhagic Conversion**

Hemorrhagic conversion may be a consequence of ischemic stroke and may be symptomatic, resulting in neurologic deterioration, or asymptomatic. Symptomatic Hemorrhagic Conversion is defined neuroimaging evidence of hemorrhage within the area of infarction associated with clinical

deterioration (eg. increase in NIHSS of  $\geq 4$  points) or death, symptoms to hemorrhage related mass effect, or symptoms out of proportion to what would be expected from the ischemic stroke or cerebral edema alone. When an Ischemic Stroke with Symptomatic Hemorrhagic Conversion is identified, the date and time of stroke onset will refer to the first onset of the Ischemic Stroke and will not be counted as two events.

#### Hemorrhagic Stroke

Hemorrhagic stroke is defined as an acute episode of focal or global cerebral or spinal dysfunction caused by a non-traumatic intraparenchymal, intraventricular, or subarachnoid hemorrhage.

#### Undetermined- or Uncertain type- of Stroke

Undetermined stroke is defined as a stroke with insufficient information to allow categorization as Ischemic Stroke or Hemorrhagic Stroke. If possible, speculate on the stroke subtype and note in Comments. This is not to signify an indeterminate event where there is insufficient evidence to suspect a stroke had occurred.

### **Sample Size and Power Calculations**

ISCHEMIA-CKD was originally designed to randomize approximately 1,000 participants. The sample size was estimated to provide 80-95% power to detect a 15% to 19% relative reduction in the primary composite Outcome assuming the 4-year cumulative rate of the primary composite Outcome is 50-70% in participants randomized to the conservative strategy. The projected event rate for the primary composite Outcome in the conservative strategy participants was based on multiple observational studies although none enrolled precisely the cohort under consideration. The sample size was revised to 650 participants (range 500-700) due to slow recruitment. The final sample size of 777 participants provided approximately 80% power to detect a 22% to 24% relative reduction in the primary outcome assuming an aggregate 4-year rate of 41% to 48% and accrual of 240 to 270 primary outcome events.



## IV. Supplementary Tables

**Table S1. ISCHEMIA and ISCHEMIA-CKD: Differences in Trial Design**

| <b>Parameter</b>                                        | <b>ISCHEMIA</b>                                                                                                                                     | <b>ISCHEMIA-CKD</b>                                                                                                                                                                                                          |
|---------------------------------------------------------|-----------------------------------------------------------------------------------------------------------------------------------------------------|------------------------------------------------------------------------------------------------------------------------------------------------------------------------------------------------------------------------------|
| Inclusion Criteria                                      | eGFR $\geq$ 30                                                                                                                                      | eGFR <30 or on dialysis                                                                                                                                                                                                      |
| Coronary CT Angiography required prior to randomization | Yes (in those with eGFR >60)                                                                                                                        | No                                                                                                                                                                                                                           |
| Core lab review of stress test                          | Yes                                                                                                                                                 | No                                                                                                                                                                                                                           |
| Primary Outcome                                         | Cardiovascular death, myocardial infarction, hospitalization for unstable angina, hospitalization for heart failure, or resuscitated cardiac arrest | Death or myocardial infarction                                                                                                                                                                                               |
| Invasive Strategy guidelines                            | Recommendation for coronary angiography, revascularization, FFR use and heart team                                                                  | Similar to ISCHEMIA + recommendation to minimize risk of acute kidney injury and involvement of heart-kidney team                                                                                                            |
| Conservative Strategy guidelines                        | Algorithm for angina, hypertension and LDL-C management (high intensity statins)                                                                    | Similar to ISCHEMIA + moderate or high intensity statins in those on dialysis; renal dosing of medications                                                                                                                   |
| PACE lifestyle counseling                               | Full PACE counseling                                                                                                                                | The recommendations provided in the PACE guidelines on fluid and fruit intake may not apply to CKD participants especially if they are on dialysis. CKD participants should follow the recommendation of their nephrologist. |
| Quality of Life (QOL) and Economics                     | Brief QoL and full QoL collected<br>Medical billing data collected                                                                                  | Only brief QoL collected<br>Medical billing data not collected for ISCHEMIA CKD participants                                                                                                                                 |
| First participant randomized                            | August 7, 2012                                                                                                                                      | May 12, 2014                                                                                                                                                                                                                 |

**Table S2. Industry Support**

| <b>MEDICATIONS AND DEVICES PROVIDED BY INDUSTRY</b> |                                                                                       |                                                                                                                                                                                                                                                                            |
|-----------------------------------------------------|---------------------------------------------------------------------------------------|----------------------------------------------------------------------------------------------------------------------------------------------------------------------------------------------------------------------------------------------------------------------------|
| <b>Company Name</b>                                 | <b>Product</b>                                                                        | <b>Country</b>                                                                                                                                                                                                                                                             |
| Abbott, Abbott Vascular                             | XIENCE Everolimus Eluting Coronary Stent System                                       | ALL                                                                                                                                                                                                                                                                        |
| Abbott (previously St. Jude Medical)                | PressureWire™ Certus and PressureWire™ Aeris; RadiAnalyzer™ Xpress Measurement System | Argentina; Australia; Austria; Belgium; Brazil; Canada; China; Egypt; France; Hungary; India; Israel; Lithuania; Malaysia; Netherlands; New Zealand; Poland; Russia; Saudi Arabia; Serbia; Singapore; South Africa; Spain; Taiwan; Thailand; UK; United Arab Emirates; USA |
| Arbor Pharmaceuticals                               | Nitrolingual® Pumpspray (nitroglycerin lingual spray)                                 | Canada ( <i>distributor Pohl Boskamp</i> ); USA                                                                                                                                                                                                                            |
|                                                     | Edarbi® (azilsartan medoxomil)                                                        | USA                                                                                                                                                                                                                                                                        |
|                                                     | Edarbyclor® (azilsartan medoxomil/chlorthalidone)                                     | USA                                                                                                                                                                                                                                                                        |
| AstraZeneca                                         | Crestor® (rosuvastatin calcium)<br>Brilinta® (ticagrelor)                             | Brazil; Canada; China; Mexico; Singapore; USA                                                                                                                                                                                                                              |
| Espero Pharmaceuticals                              | GoNitro™ (nitroglycerin) sublingual powder                                            | USA                                                                                                                                                                                                                                                                        |
| Medtronic                                           | Resolute Integrity DES                                                                | ALL                                                                                                                                                                                                                                                                        |
| Merck & Co.                                         | Zetia® (ezetimibe)<br>Vytorin® (ezetimibe and simvastatin)                            | Argentina; Brazil; USA                                                                                                                                                                                                                                                     |
| Omron                                               | Pedometers                                                                            | ALL                                                                                                                                                                                                                                                                        |
| Philips (previously Volcano Corporation)            | Prime Wire<br>Prestige PLUS<br>Imaging Consoles                                       | Austria, Belgium, Canada, France, Germany, Italy, Japan, Netherlands, Poland, Portugal, South Africa, Spain, Sweden, UK, USA                                                                                                                                               |
| Sunovion Pharmaceuticals                            | Niaspan® (extended-release niacin)                                                    | Canada                                                                                                                                                                                                                                                                     |

**Table S3. Ischemia Eligibility Criteria by Stress Test Modality**

| Stress Test Modality                                            | Diagnostic Criteria for Moderate or Severe Ischemia                                                                                                                                                                                                                                                                                                                                                                                                                                                                                                                                                                                                                                                                                                                                                                                                                                                                                                                                                           |
|-----------------------------------------------------------------|---------------------------------------------------------------------------------------------------------------------------------------------------------------------------------------------------------------------------------------------------------------------------------------------------------------------------------------------------------------------------------------------------------------------------------------------------------------------------------------------------------------------------------------------------------------------------------------------------------------------------------------------------------------------------------------------------------------------------------------------------------------------------------------------------------------------------------------------------------------------------------------------------------------------------------------------------------------------------------------------------------------|
| Nuclear perfusion via SPECT or PET                              | ≥10% myocardium ischemic <sup>1</sup>                                                                                                                                                                                                                                                                                                                                                                                                                                                                                                                                                                                                                                                                                                                                                                                                                                                                                                                                                                         |
| Echocardiography                                                | ≥3/16 segments with stress-induced severe hypokinesis or akinesis                                                                                                                                                                                                                                                                                                                                                                                                                                                                                                                                                                                                                                                                                                                                                                                                                                                                                                                                             |
| Cardiac Magnetic Resonance                                      | Perfusion: ≥12% myocardium ischemic, and/or<br>Wall motion: ≥3/16 segments with stress-induced severe hypokinesis or akinesis                                                                                                                                                                                                                                                                                                                                                                                                                                                                                                                                                                                                                                                                                                                                                                                                                                                                                 |
| Exercise Test without Imaging<br>(criteria 1-3 must all be met) | <ol style="list-style-type: none"> <li>1. Absence of resting ST-segment depression ≥1.0 mm or confounders that render exercise ECG non-interpretable (LBBB, LVH with repolarization, pacemaker, etc.)</li> <li>2. As compared to the baseline tracing, additional exercise-induced horizontal or downsloping ST-segment depression ≥1.5 mm in 2 leads <i>or</i> ≥2.0 mm in any lead; ST-segment elevation ≥1mm in a non-infarct territory. Both the J-point and the ST-segment at 80 msec need to meet criteria. When the HR is &gt;130/min, the ST-segment at 60 msec. may be used if the segment at 80 msec. cannot be determined.</li> <li>3. Either of the following:               <ol style="list-style-type: none"> <li>a. Workload at which ST-segment criteria are met is not to exceed completion of stage 2 of a standard Bruce protocol or 7 METs if a non-Bruce protocol is used <i>or</i></li> <li>b. ST segment criteria are met at &lt;75% of the maximum predicted HR</li> </ol> </li> </ol> |

**Table S4. Inclusion and Exclusion Criteria**

---

|                    |                                                                                                                                                                                                                                                                                                                                                                                                                                                                                                                                                                                                                                                                                                                                                                                                                                                                                                                                                                                                                                                                                                                                                                                                                                                                                                                                                                                                                                                                                                                          |
|--------------------|--------------------------------------------------------------------------------------------------------------------------------------------------------------------------------------------------------------------------------------------------------------------------------------------------------------------------------------------------------------------------------------------------------------------------------------------------------------------------------------------------------------------------------------------------------------------------------------------------------------------------------------------------------------------------------------------------------------------------------------------------------------------------------------------------------------------------------------------------------------------------------------------------------------------------------------------------------------------------------------------------------------------------------------------------------------------------------------------------------------------------------------------------------------------------------------------------------------------------------------------------------------------------------------------------------------------------------------------------------------------------------------------------------------------------------------------------------------------------------------------------------------------------|
| Inclusion Criteria | <ul style="list-style-type: none"><li>• At least moderate ischemia on an exercise or pharmacologic stress test</li><li>• End-stage renal disease on dialysis or estimated glomerular filtration rate (eGFR) &lt;30mL/min/1.73m<sup>2</sup></li><li>• Willingness to comply with all aspects of the protocol, including adherence to the assigned strategy, medical therapy and follow-up visits</li><li>• Willingness to give written informed consent</li><li>• Age ≥ 21 years</li></ul>                                                                                                                                                                                                                                                                                                                                                                                                                                                                                                                                                                                                                                                                                                                                                                                                                                                                                                                                                                                                                                |
| Exclusion Criteria | <ul style="list-style-type: none"><li>• Left ventricular ejection fraction &lt; 35%</li><li>• History of unprotected left main stenosis ≥50% on prior coronary computed tomography angiography (CCTA) or prior cardiac catheterization (if available)</li><li>• Finding of “no obstructive coronary artery disease ” (&lt;50% stenosis in all major epicardial vessels) on prior CCTA or prior catheterization, performed within 12 months</li><li>• Coronary anatomy unsuitable for either percutaneous coronary intervention (PCI) or coronary artery bypass grafting (CABG)</li><li>• Unacceptable level of angina despite maximal medical therapy</li><li>• Very dissatisfied with medical management of angina</li><li>• History of noncompliance with medical therapy</li><li>• Acute coronary syndrome within the previous 2 months</li><li>• PCI within the previous 12 months</li><li>• Stroke within the previous 6 months or spontaneous intracranial hemorrhage at any time</li><li>• History of ventricular tachycardia requiring therapy for termination, or symptomatic sustained ventricular tachycardia not due to a transient reversible cause</li><li>• NYHA class III-IV heart failure at entry or hospitalization for exacerbation of chronic heart failure within the previous 6 months</li><li>• Non-ischemic dilated or hypertrophic cardiomyopathy</li><li>• Severe valvular disease or valvular disease likely to require surgery or percutaneous valve replacement during the trial</li></ul> |

---

- 
- Allergy to radiographic contrast that cannot be adequately pre-medicated, or any prior anaphylaxis to radiographic contrast
  - Planned major surgery necessitating interruption of dual antiplatelet therapy (note that patients may be eligible after planned surgery)
  - Life expectancy less than the duration of the trial due to non-cardiovascular comorbidity
  - Pregnancy
  - High likelihood of significant unprotected left main stenosis, in the judgment of the patient's physician
  - Enrollment in a competing trial that involves a non-approved cardiac drug or device
  - Inability to comply with the protocol
  - Body weight or size exceeding the limit for cardiac catheterization at the site
  - Canadian Cardiovascular Society Class III angina of recent onset, OR angina of any class with a rapidly progressive or accelerating pattern
  - Canadian Cardiovascular Society Class IV angina, including unprovoked rest angina
  - High risk of bleeding which would contraindicate the use of dual antiplatelet therapy
  - Cardiac transplant recipient
  - Prior CABG, unless CABG was performed more than 12 months ago, and coronary anatomy has been demonstrated to be suitable for PCI or repeat CABG to accomplish complete revascularization of ischemic areas
-

**Table S5. Baseline and On-Trial Physiologic Measurements, Risk Factors, and Medications by Treatment Group**

| Variables                                   | Baseline               | Last Visit             | Baseline               |                        | Last Visit             |                        |
|---------------------------------------------|------------------------|------------------------|------------------------|------------------------|------------------------|------------------------|
|                                             | Total<br>(N=777)       | Total<br>(N=777)       | INV<br>(N=388)         | CON<br>(N=389)         | INV<br>(N=388)         | CON<br>(N=389)         |
| Systolic BP <140 mm Hg                      | 55.3% (429/776)        | 68.6% (450/656)        | 54.3% (210/387)        | 56.3% (219/389)        | 67.5% (214/317)        | 69.6% (236/339)        |
| LDL cholesterol <70 mg/dl                   | 34.9% (254/727)        | 49.4% (298/603)        | 35.1% (126/359)        | 34.8% (128/368)        | 49.1% (144/293)        | 49.7% (154/310)        |
| Not smoking                                 | 89.2% (693/777)        | 92.1% (580/630)        | 88.1% (342/388)        | 90.2% (351/389)        | 90.6% (278/307)        | 93.5% (302/323)        |
| <b>Medications</b>                          |                        |                        |                        |                        |                        |                        |
| Aspirin or aspirin alternative              | 83.2% (616/740)        | 87.4% (548/627)        | 84.2% (314/373)        | 82.3% (302/367)        | 87.7% (265/302)        | 87.1% (283/325)        |
| Clopidogrel                                 | 22.6% (175/776)        | 26.4% (175/664)        | 23.0% (89/387)         | 22.1% (86/389)         | 29.1% (94/323)         | 23.8% (81/341)         |
| Anticoagulant                               | 10.4% (79/763)         | 10.3% (68/661)         | 9.5% (36/379)          | 11.2% (43/384)         | 11.2% (36/322)         | 9.4% (32/339)          |
| Antiplatelet or anticoagulant               | 100% (652/652)         | 100% (585/585)         | 100% (328/328)         | 100% (324/324)         | 100% (286/286)         | 100% (299/299)         |
| Statin                                      | 81.1% (629/776)        | 85.2% (566/664)        | 81.7% (316/387)        | 80.5% (313/389)        | 87.0% (281/323)        | 83.6% (285/341)        |
| High-intensity statin                       | 32.4% (203/626)        | 43.2% (259/600)        | 35.0% (110/314)        | 29.8% (93/312)         | 45.6% (136/298)        | 40.7% (123/302)        |
| Ezetimibe                                   | 3.5% (27/776)          | 18.4% (122/664)        | 4.1% (16/387)          | 2.8% (11/389)          | 19.5% (63/323)         | 17.3% (59/341)         |
| ACE inhibitor / ARB                         | 47.7% (370/776)        | 42.6% (283/664)        | 47.5% (184/387)        | 47.8% (186/389)        | 41.8% (135/323)        | 43.4% (148/341)        |
| <b>Adherence to Medications<sup>1</sup></b> | <b>64.1% (479/747)</b> | <b>73.1% (469/642)</b> | <b>63.2% (234/370)</b> | <b>65.0% (245/377)</b> | <b>71.7% (226/315)</b> | <b>74.3% (243/327)</b> |

ACE= angiotensin converting enzyme; ARB= angiotensin receptor blockers; BP= blood pressure; CON= conservative; INV= invasive; LDL= low density lipoprotein. Aspirin alternative denotes P2Y12 inhibitor. Antiplatelet denotes aspirin or P2Y12 inhibitor. <sup>1</sup>Based on Morisky-Green-Levine medication adherence survey (Morisky DE, Green LW, Levine DM. Concurrent and predictive validity of a self-reported measure of medication adherence. Medical Care 1986;24:67-74). A summary binary variable was created by coding those who responded strongly agree, agree, don't know, or refuse to any of the 4 questions in the survey as nonadherent; otherwise, patients were coded as adherent.

**Table S6. Coronary Angiography and Revascularization in the Invasive Strategy**

| <b>Parameter</b>                                                             | <b>Invasive<br/>(N=388)</b> |
|------------------------------------------------------------------------------|-----------------------------|
| <b>Angiographic Characteristics</b>                                          |                             |
| Number of Native Vessels With ≥50% Stenosis (QCA)                            |                             |
| 0                                                                            | 26.5% (82/310)              |
| 1                                                                            | 22.3% (69/310)              |
| 2                                                                            | 28.1% (87/310)              |
| 3                                                                            | 23.2% (72/310)              |
| Specific Native Vessels With ≥ 50% Stenosis (QCA)                            |                             |
| Left main                                                                    | 2.5% (8/326)                |
| Left Anterior Descending                                                     | 57.2% (183/320)             |
| Proximal Left Anterior Descending                                            | 21.2% (69/326)              |
| Left Circumflex                                                              | 44.4% (143/322)             |
| Right Coronary Artery                                                        | 45.4% (142/313)             |
| FFR use                                                                      | 19.3% (62/321)              |
| <b>Revascularization Characteristics</b>                                     |                             |
| PCI                                                                          | 84.7% (161/190)             |
| Stent use                                                                    | 91.9% (148/161)             |
| DES use                                                                      | 100% (146/146)              |
| Second Generation DES                                                        | 97.9% (143/146)             |
| First Generation DES                                                         | 2.1% (3/146)                |
| Stent not deliverable                                                        | 4.3% (7/161)                |
| Balloon angioplasty only                                                     | 3.1% (5/161)                |
| CABG                                                                         | 15.3% (29/190)              |
| IMA use                                                                      | 86.2% (25/29)               |
| <b>Reasons for No Coronary Angiography (site-reported)</b>                   |                             |
|                                                                              | 64 (16.5%)                  |
| Intercurrent Illness                                                         | 21.9% (14/64)               |
| Participant Died                                                             | 9.4% (6/64)                 |
| Patient Preference                                                           | 37.5% (24/64)               |
| Physician Preference                                                         | 9.4% (6/64)                 |
| Other                                                                        | 14.1% (9/64)                |
| Missing or Unknown                                                           | 7.8% (5/64)                 |
| <b>Reasons for No Revascularization During Follow-up<br/>(site-reported)</b> |                             |
| Medical Therapy Only                                                         | 95.5% (128/134)             |
| No Obstructive Coronary Artery Disease                                       | 75.4% (101/134)             |
| Anatomy Not Suitable for Any Mode of<br>Revascularization                    | 14.2% (19/134)              |
| Patient Preference                                                           | 3.0% (4/134)                |
| Other                                                                        | 3.0% (4/134)                |
| Intent to Perform PCI / CABG / Hybrid                                        | 3.7% (5/134)                |
| Unknown                                                                      | 0.7% (1/134)                |

CABG=coronary artery bypass graft surgery; DES=drug eluting stent; FFR=fractional flow reserve; IMA= internal mammary graft; IMA=internal mammary artery; PCI=percutaneous coronary intervention; QCA= quantitative coronary angiography.



**Table S7. Outcomes based on Secondary Definition of Myocardial Infarction**

| Outcome                                                                                                                      | Number of Subjects with Event |              | 3-year Cumulative Incidence Rates |                      | Hazard Ratio Invasive vs. Conservative (95% CI) |                   |
|------------------------------------------------------------------------------------------------------------------------------|-------------------------------|--------------|-----------------------------------|----------------------|-------------------------------------------------|-------------------|
|                                                                                                                              | Invasive                      | Conservative | Invasive                          | Conservative         | Unadjusted                                      | Adjusted          |
| All-cause Death or myocardial infarction                                                                                     | 134                           | 133          | 38.7% (32.9%, 44.5%)              | 37.6% (32.0%, 43.3%) | 1.07 (0.85, 1.37)                               | 1.10 (0.86, 1.40) |
| All-cause Death, myocardial infarction, Hospitalization for Unstable Angina or Heart Failure, or Resuscitated Cardiac Arrest | 142                           | 142          | 40.6% (34.7%, 46.4%)              | 40.6% (34.8%, 46.3%) | 1.07 (0.85, 1.35)                               | 1.09 (0.87, 1.38) |
| All-cause Death, myocardial infarction, or stroke                                                                            | 143                           | 135          | 41.5% (35.5%, 47.4%)              | 37.9% (32.2%, 43.5%) | 1.16 (0.91, 1.46)                               | 1.19 (0.94, 1.50) |
| Myocardial infarction                                                                                                        | 67                            | 60           | 20.4% (15.9%, 25.4%)              | 16.9% (13.0%, 21.3%) | 1.19 (0.84, 1.69)                               | 1.19 (0.84, 1.69) |
| Procedural myocardial infarction                                                                                             | 28                            | 11           | 7.3% (5.0%, 10.2%)                | 3.1% (1.6%, 5.4%)    | 2.69 (1.34, 5.39)                               | 2.87 (1.42, 5.79) |
| Non procedural myocardial infarction                                                                                         | 37                            | 52           | 12.7% (8.8%, 17.3%)               | 14.2% (10.6%, 18.3%) | 0.73 (0.48, 1.12)                               | 0.72 (0.47, 1.09) |

**Table S8. Rate of Revascularization in ACS trials of Invasive vs. Conservative which Randomized Participants Prior to Defining Coronary Anatomy**

| <b>Trial</b>               | <b>% Revascularization in Invasive Arm</b> |
|----------------------------|--------------------------------------------|
| <b>RITA-3</b>              | 44%                                        |
| <b>VANQUISH</b>            | 44%                                        |
| <b>After Eighty</b>        | 50%                                        |
| <b>Italian Elderly ACS</b> | 56%                                        |
| <b>OASIS 5</b>             | 58%                                        |
| <b>MATE</b>                | 58%                                        |
| <b>TACTICS TIMI 18</b>     | 60%                                        |
| <b>FRISC II</b>            | 77%                                        |
| <b>ICTUS</b>               | 76%                                        |

ACS= acute coronary syndrome.

## V. Supplementary Figures

Figure S1. Assessment of Proportional Hazards Assumption for Treatment Effect

Results of tests for log(time) by treatment interactions by Outcome

| Outcome                              | P-Value |
|--------------------------------------|---------|
| Death or MI                          | 0.598   |
| All-cause death / MI / UA / HF / RCA | 0.379   |
| All-cause death                      | 0.661   |
| Primary MI                           | 0.748   |
| Hospitalization for Unstable Angina  | 0.999   |
| Hospitalization for Heart Failure    | 0.917   |

### Primary Outcome (Death or MI)

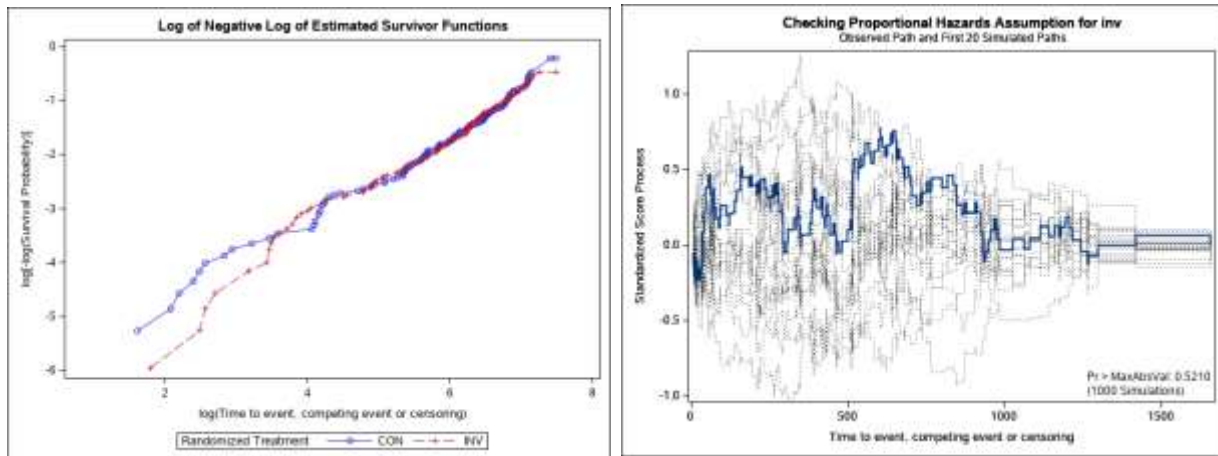

Plot of simulated empirical score processes under proportional hazards (dotted lines) and observed empirical score process (solid line). The probability that the maximum score under proportional hazards is greater than the observed maximum score is shown in the lower right corner of the plot. This can be interpreted as a p-value testing for whether the proportional hazards assumption is violated.

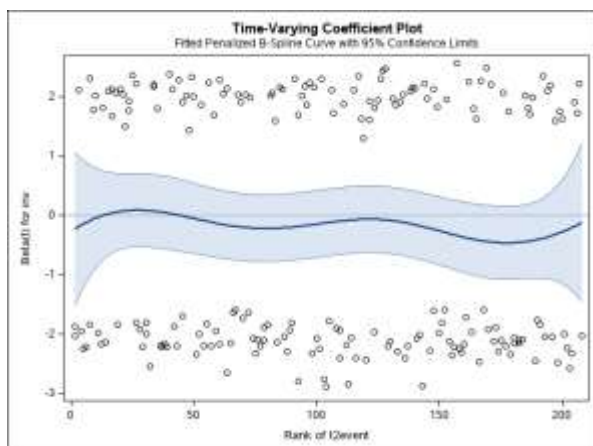

Plot of weighted Schoenfeld residuals by the ordered rank of times when events occurred. The weighted Schoenfeld residuals are plotted as small circles. A penalized B-Spline curve with its 95% Confidence Limits for the weighted Schoenfeld residuals is fit. The further the overall slope of the spline is from being a horizontal line, the more evidence against the proportional hazards assumption.

## Major Secondary Outcome

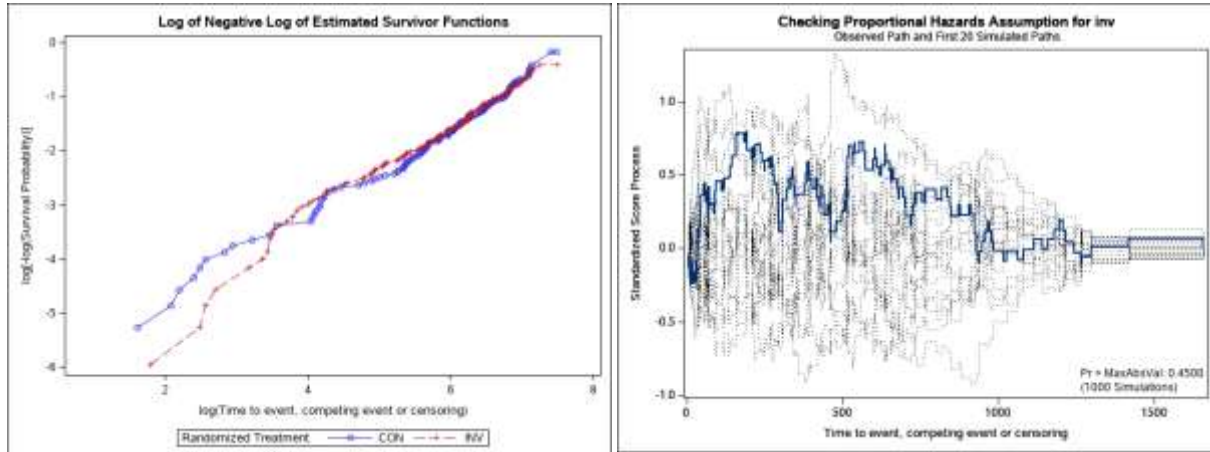

Plot of simulated empirical score processes under proportional hazards (dotted lines) and observed empirical score process (solid line). The probability that the maximum score under proportional hazards is greater than the observed maximum score is shown in the lower right corner of the plot. This can be interpreted as a p-value testing for whether the proportional hazards assumption is violated.

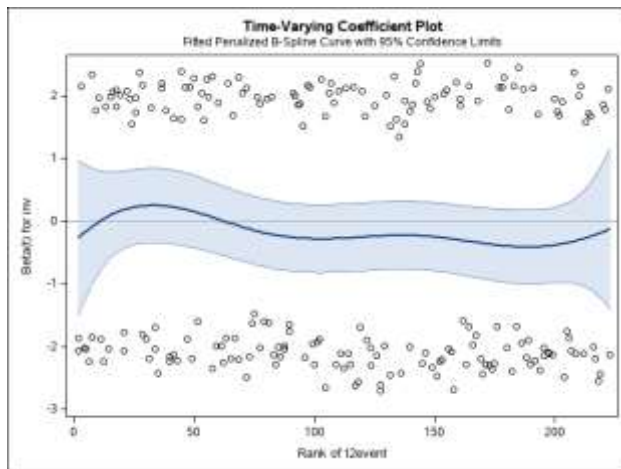

Plot of weighted Schoenfeld residuals by the ordered rank of times when events occurred. The weighted Schoenfeld residuals are plotted as small circles. A penalized B-Spline curve with its 95% Confidence Limits for the weighted Schoenfeld residuals is fit. The further the overall slope of the spline is from being a horizontal line, the more evidence against the proportional hazards assumption.

## Outcome: All-cause Death

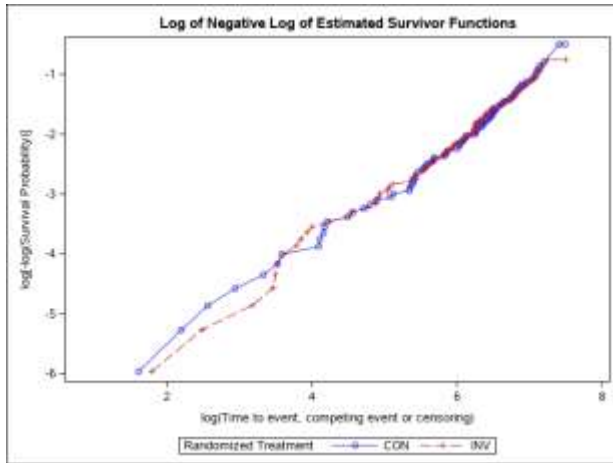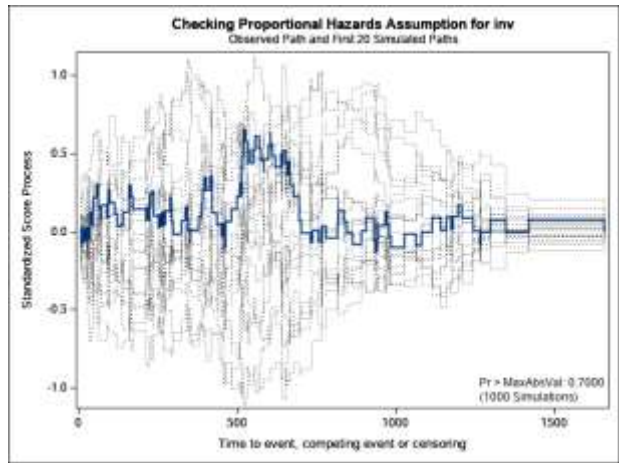

Plot of simulated empirical score processes under proportional hazards (dotted lines) and observed empirical score process (solid line). The probability that the maximum score under proportional hazards is greater than the observed maximum score is shown in the lower right corner of the plot. This can be interpreted as a p-value testing for whether the proportional hazards assumption is violated.

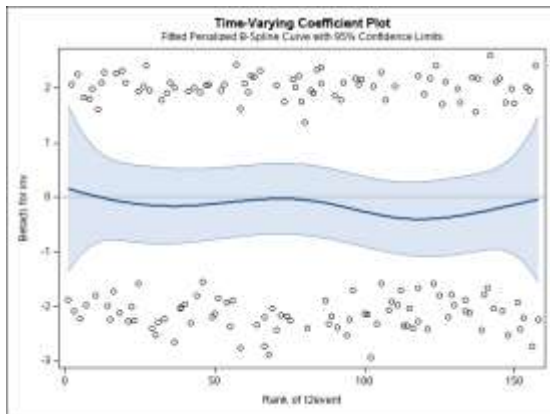

Plot of weighted Schoenfeld residuals by the ordered rank of times when events occurred. The weighted Schoenfeld residuals are plotted as small circles. A penalized B-Spline curve with its 95% Confidence Limits for the weighted Schoenfeld residuals is fit. The further the overall slope of the spline is from being a horizontal line, the more evidence against the proportional hazards assumption.

## Outcome: Myocardial Infarction

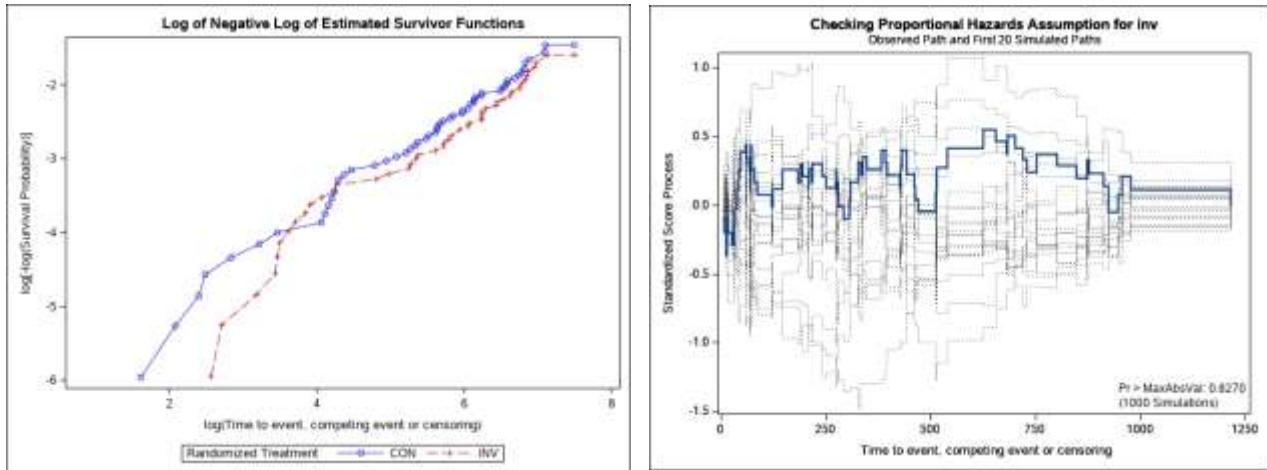

Plot of simulated empirical score processes under proportional hazards (dotted lines) and observed empirical score process (solid line). The probability that the maximum score under proportional hazards is greater than the observed maximum score is shown in the lower right corner of the plot. This can be interpreted as a p-value testing for whether the proportional hazards assumption is violated.

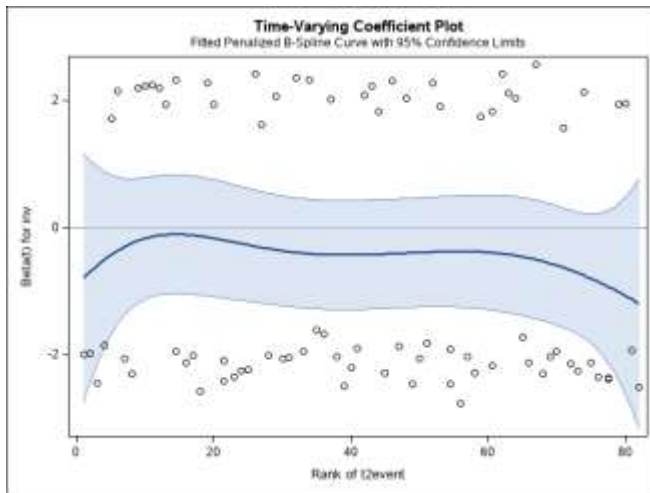

Plot of weighted Schoenfeld residuals by the ordered rank of times when events occurred. The weighted Schoenfeld residuals are plotted as small circles. A penalized B-Spline curve with its 95% Confidence Limits for the weighted Schoenfeld residuals is fit. The further the overall slope of the spline is from being a horizontal line, the more evidence against the proportional hazards assumption.

## Outcome: Hospitalization for Unstable Angina

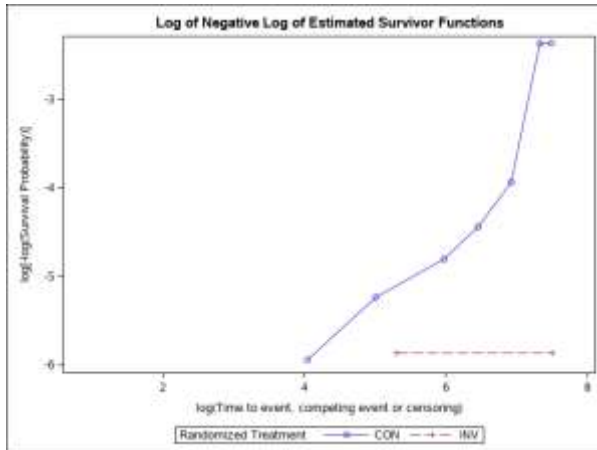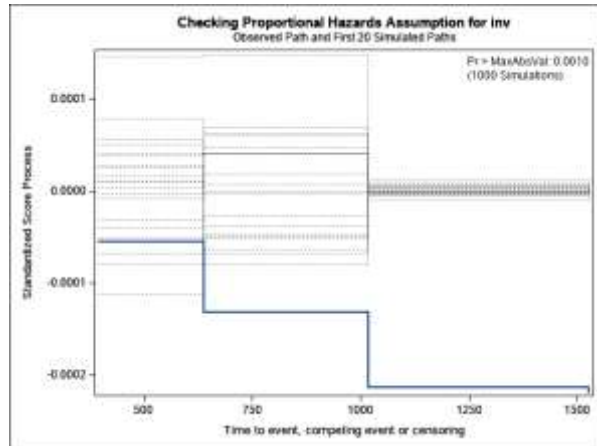

Plot of simulated empirical score processes under proportional hazards (dotted lines) and observed empirical score process (solid line). The probability that the maximum score under proportional hazards is greater than the observed maximum score is shown in the upper right corner of the plot. This can be interpreted as a p-value testing for whether the proportional hazards assumption is violated.

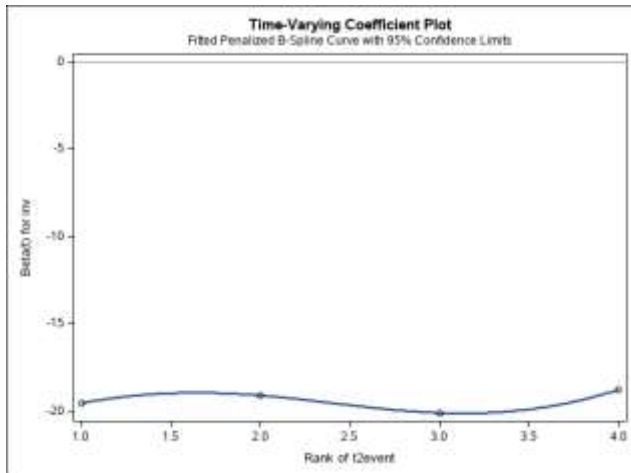

Plot of weighted Schoenfeld residuals by the ordered rank of times when events occurred. The weighted Schoenfeld residuals are plotted as small circles. A penalized B-Spline curve with its 95% Confidence Limits for the weighted Schoenfeld residuals is fit. The further the overall slope of the spline is from being a horizontal line, the more evidence against the proportional hazards assumption.

## Outcome: Hospitalization for Heart Failure

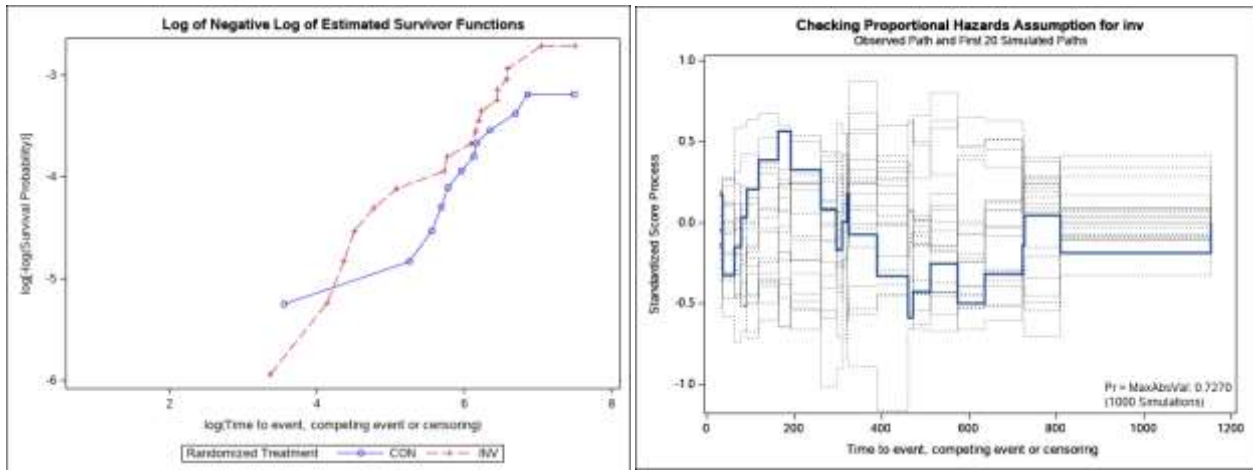

Plot of simulated empirical score processes under proportional hazards (dotted lines) and observed empirical score process (solid line). The probability that the maximum score under proportional hazards is greater than the observed maximum score is shown in the lower right corner of the plot. This can be interpreted as a p-value testing for whether the proportional hazards assumption is violated.

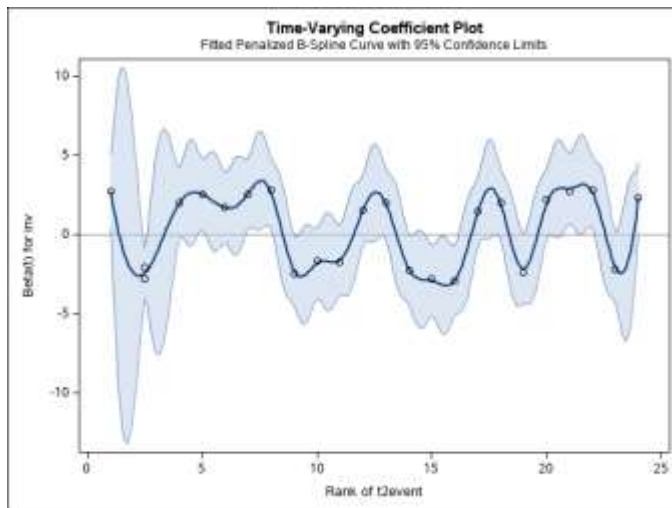

Plot of weighted Schoenfeld residuals by the ordered rank of times when events occurred. The weighted Schoenfeld residuals are plotted as small circles. A penalized B-Spline curve with its 95% Confidence Limits for the weighted Schoenfeld residuals is fit. The further the overall slope of the spline is from being a horizontal line, the more evidence against the proportional hazards assumption.



## Figure S2. Participant Flow

Proportion of patients in the conservative strategy who underwent coronary angiography or revascularization prior to an outcome event were 77 (19.8%) and 43 (11.0%) respectively.

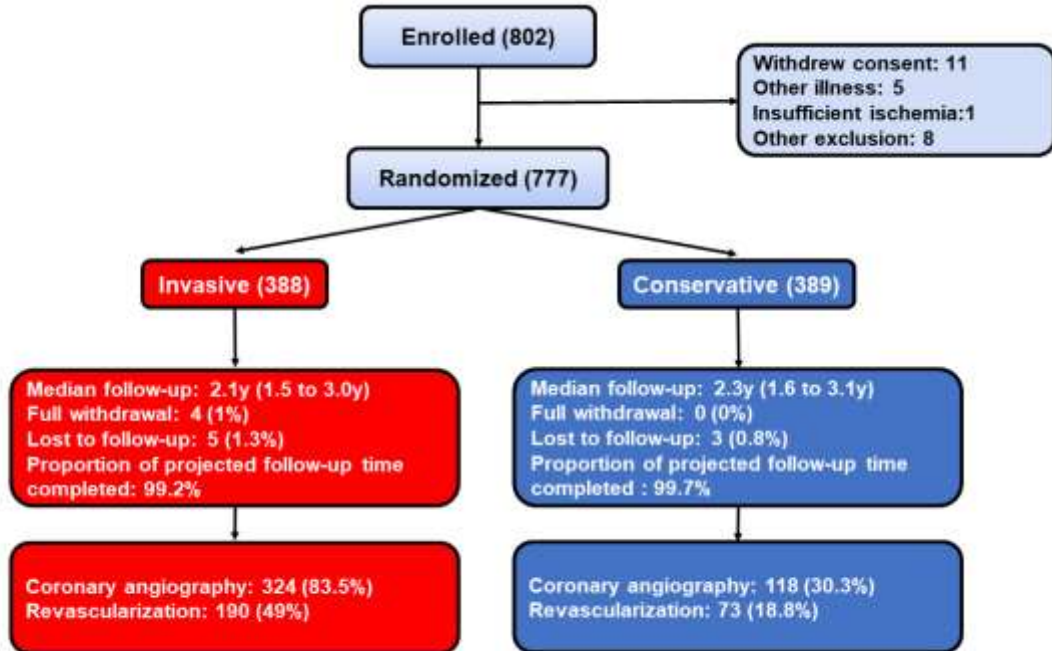

**Figure S3. Select Medications Use over Time by Treatment Group**

CCBs= calcium channel blockers; DAPT= dual antiplatelet therapy

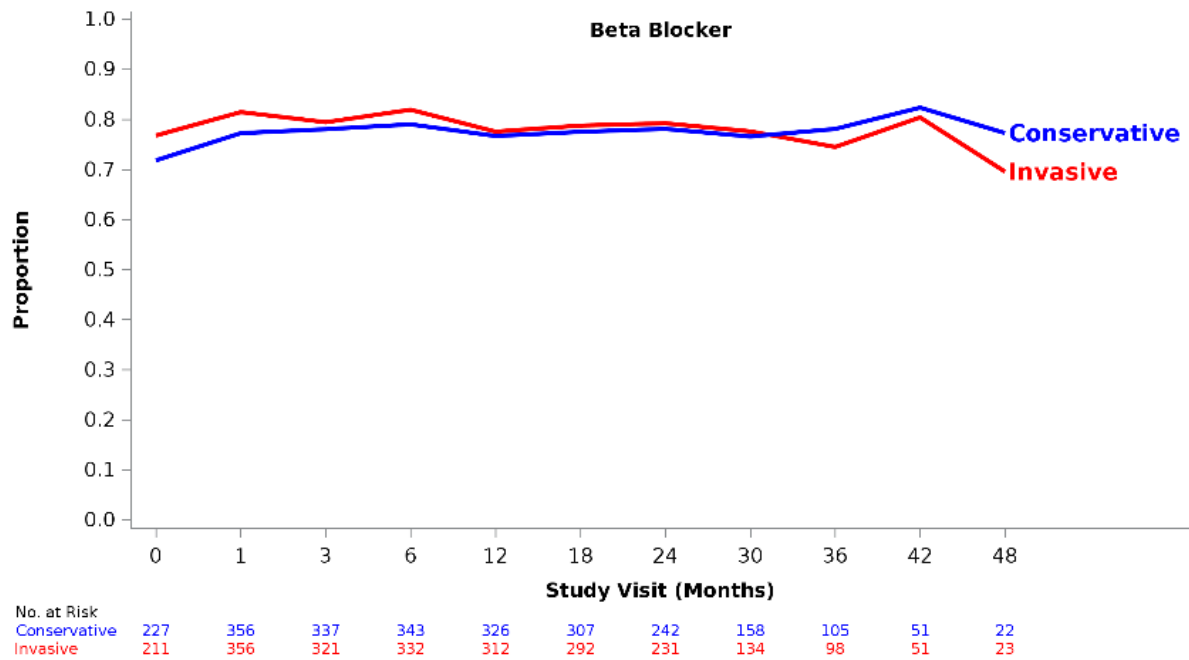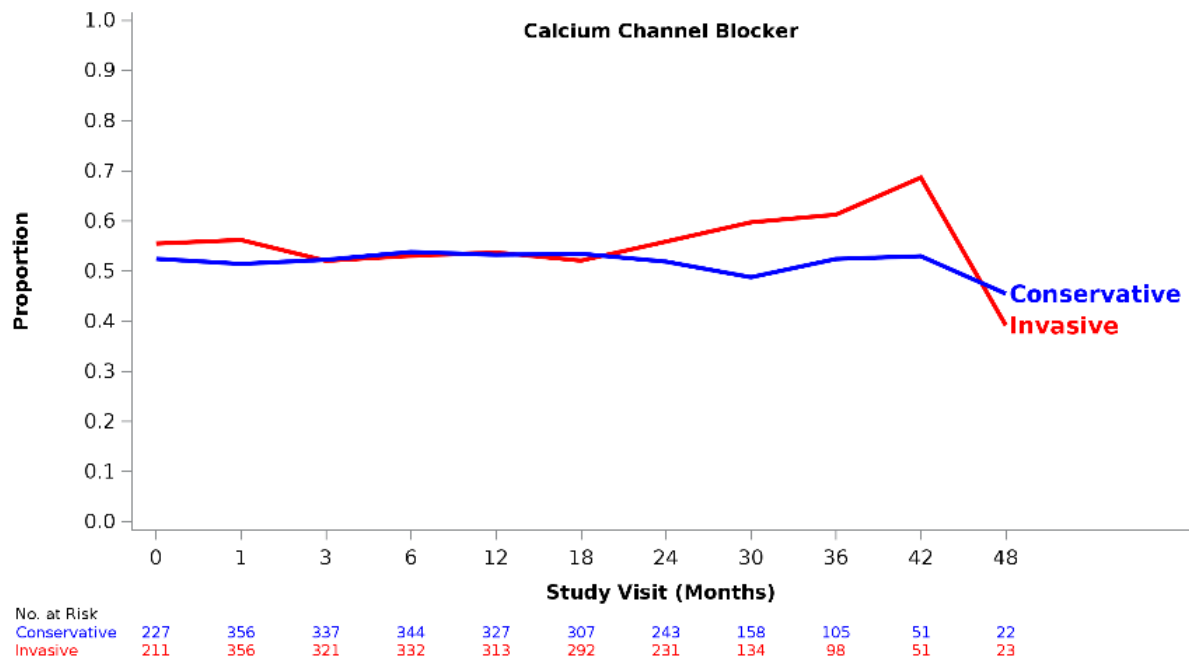

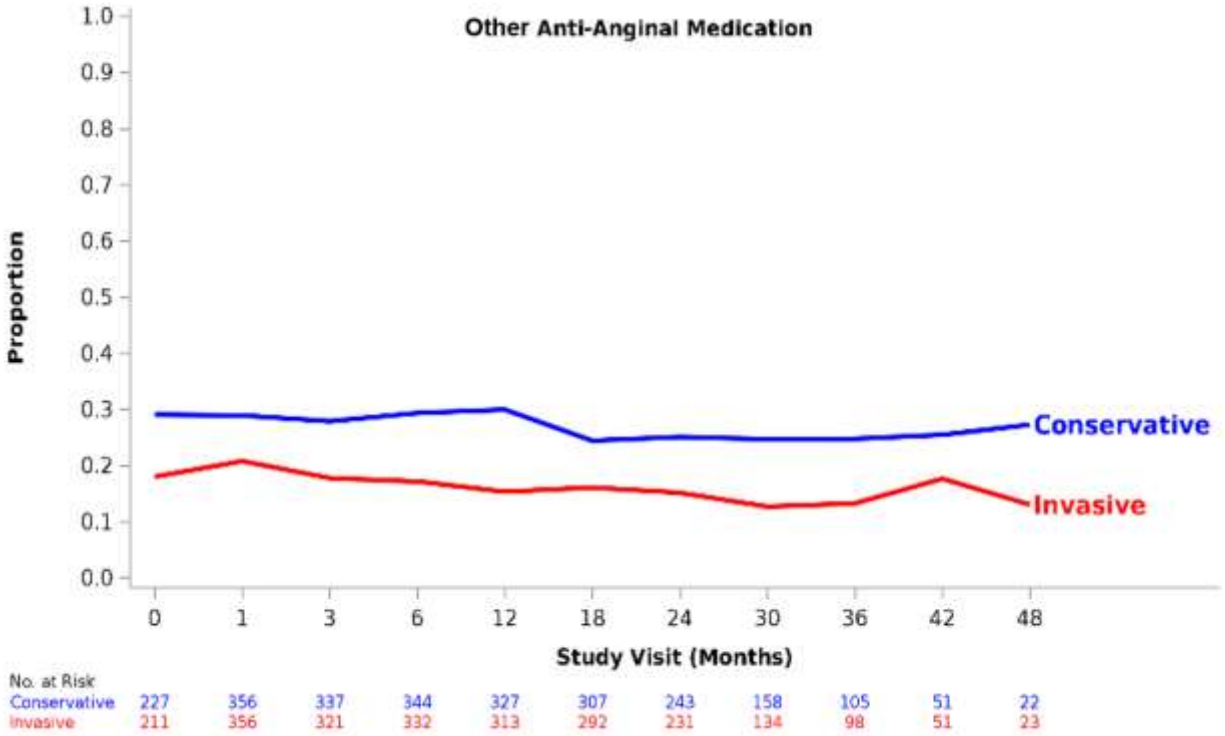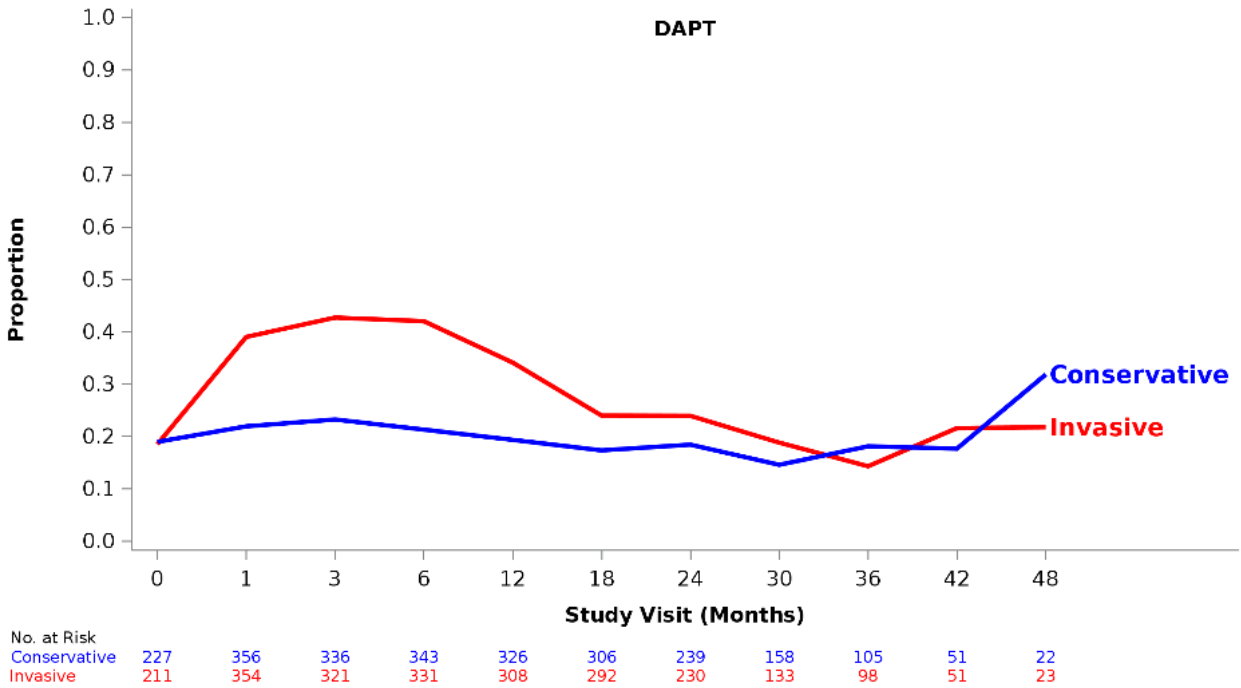

**DAPT use in patients who underwent PCI in the Invasive group**

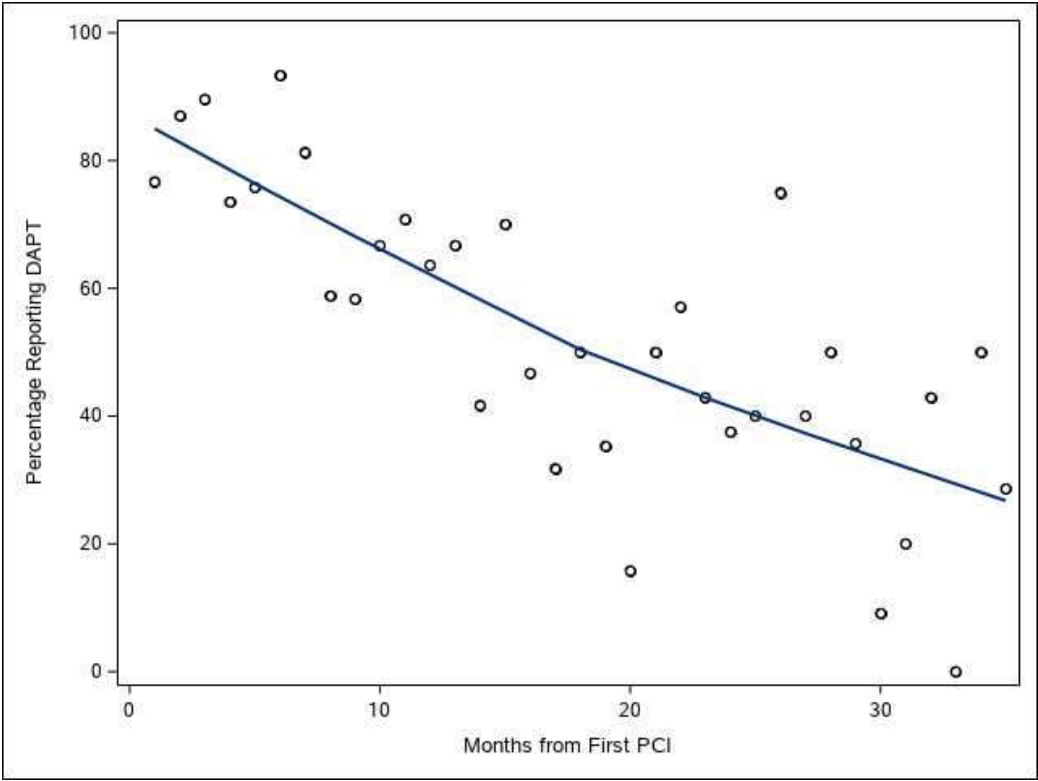

Due to timing of visits when current medication use was collected and varying DAPT duration, it does not reflect 100% DAPT use which we believe was universal. Collection of information at follow-up visits may have occurred after completion of prescribed course of DAPT.

Figure S4. Cumulative Incidence Plot of First Cardiac Catheterization and First Revascularization by Treatment Group

S4a. Coronary Angiography

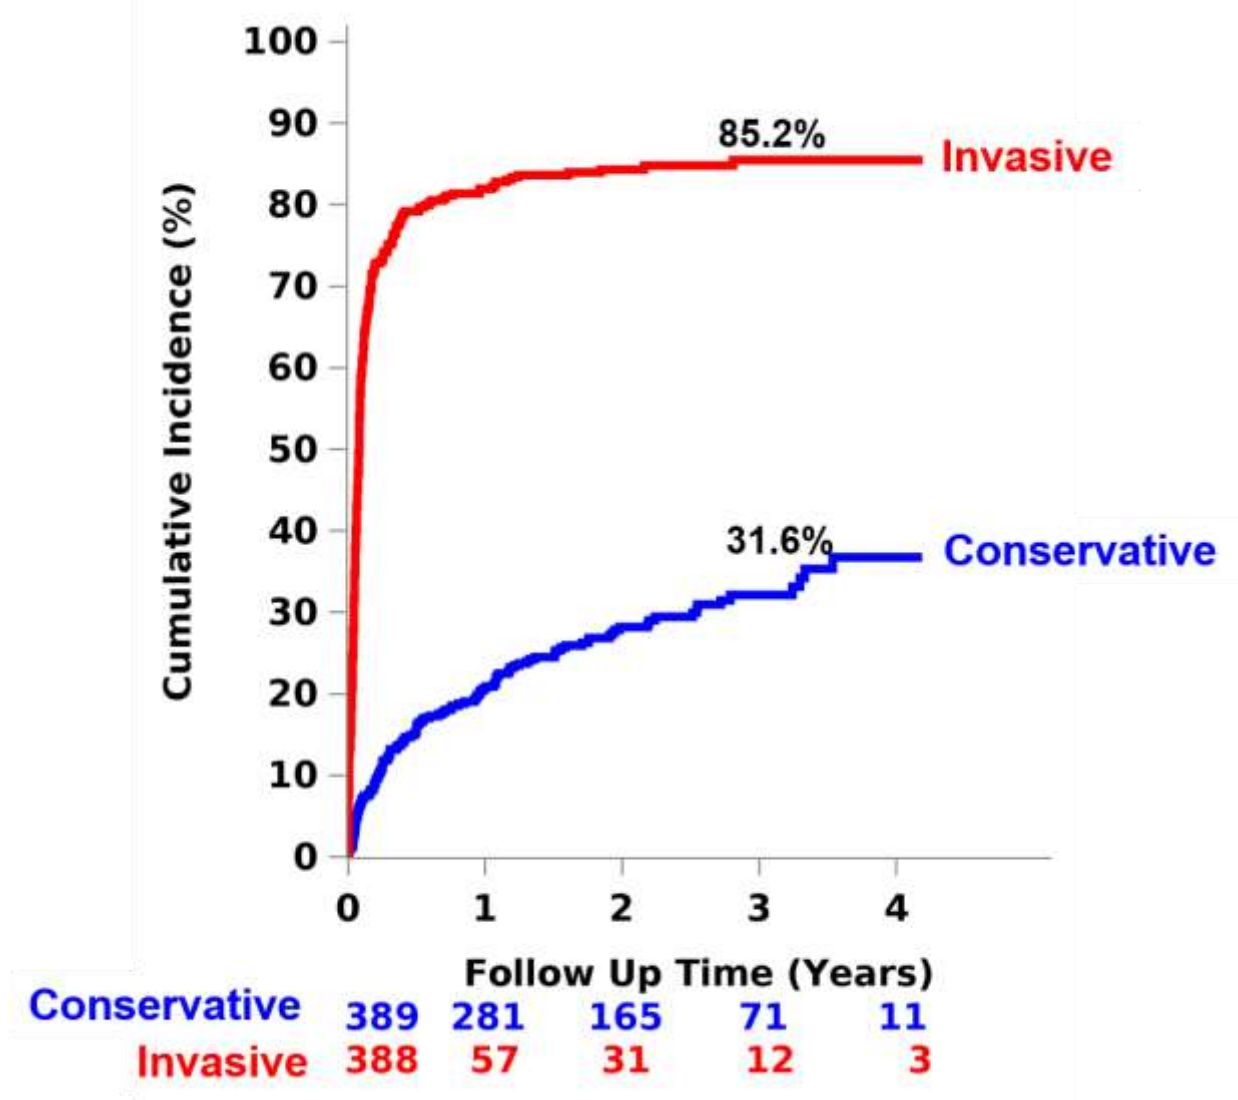

S4b. Revascularization

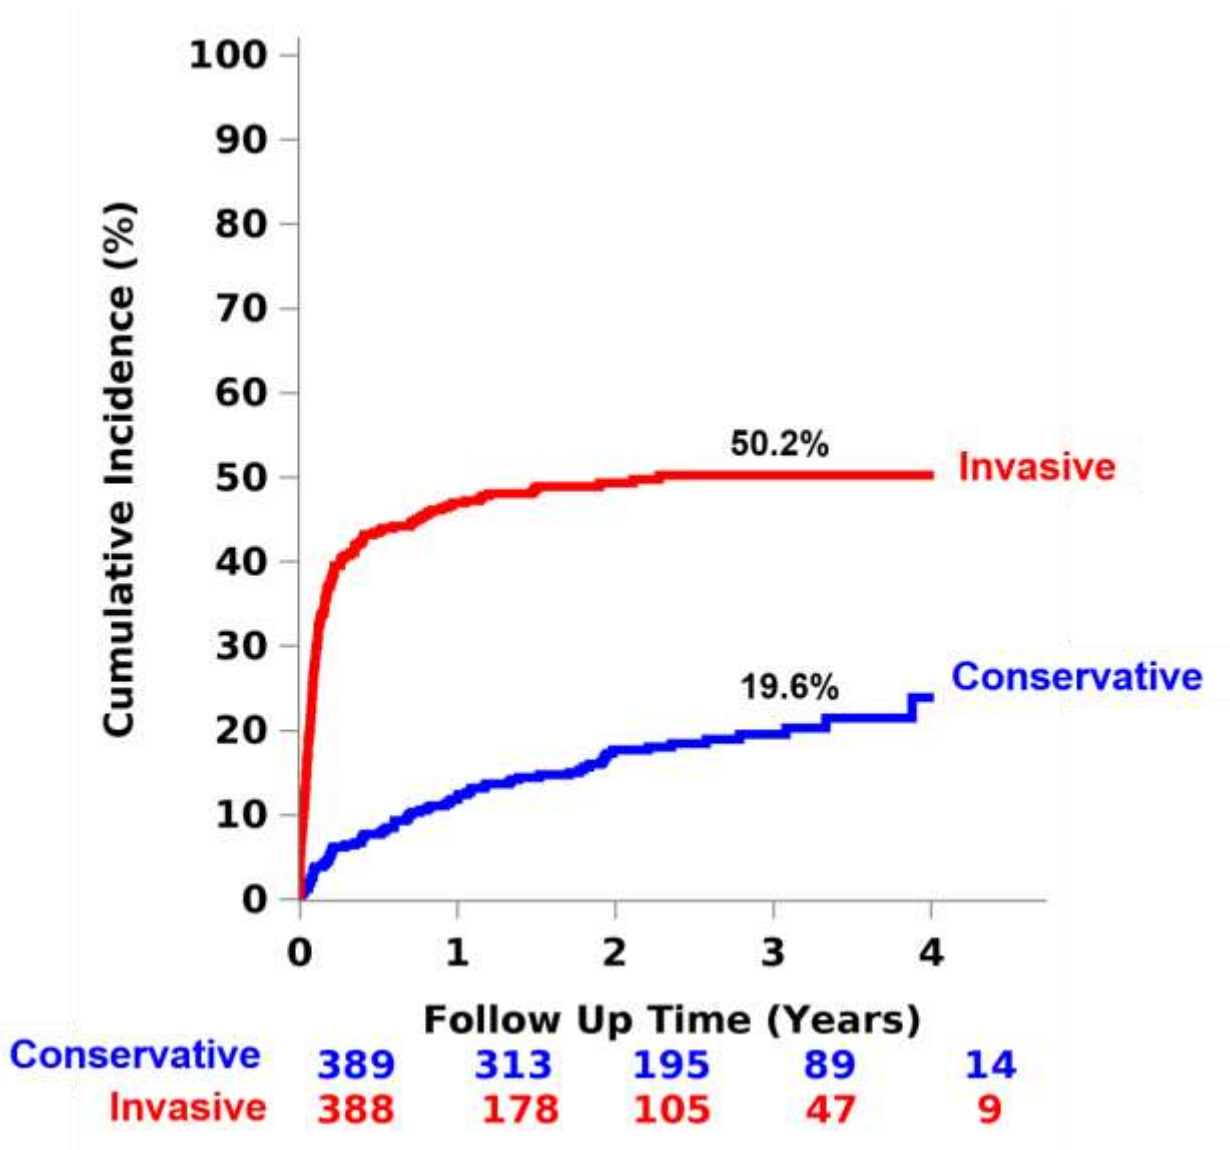

Figure S5. Reasons for Coronary Angiography and Revascularization at 3 Years in the Conservative Group

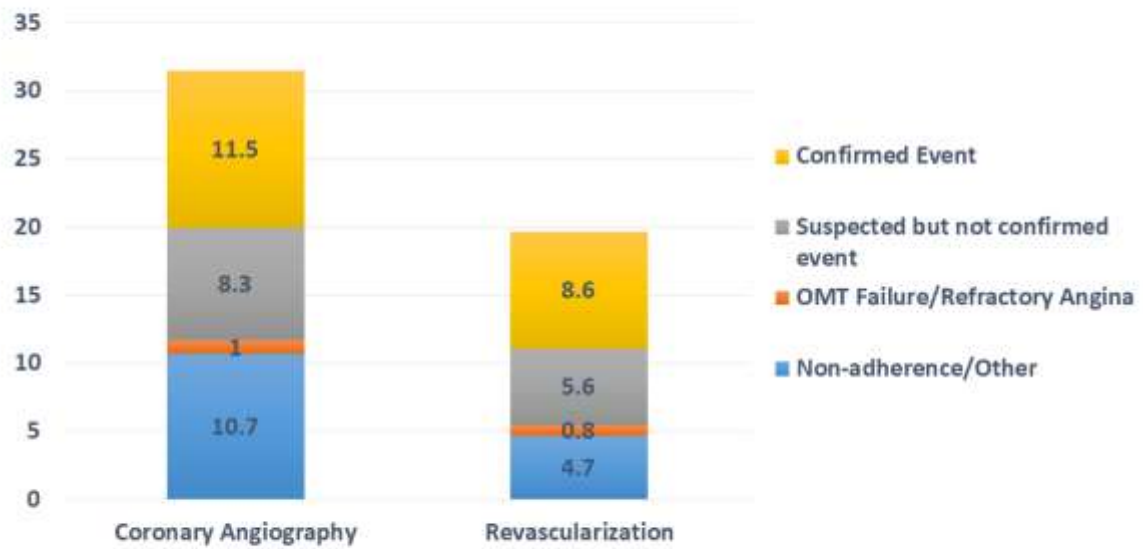

Figure S6. Posterior distribution for the Bayesian analysis for the primary outcome

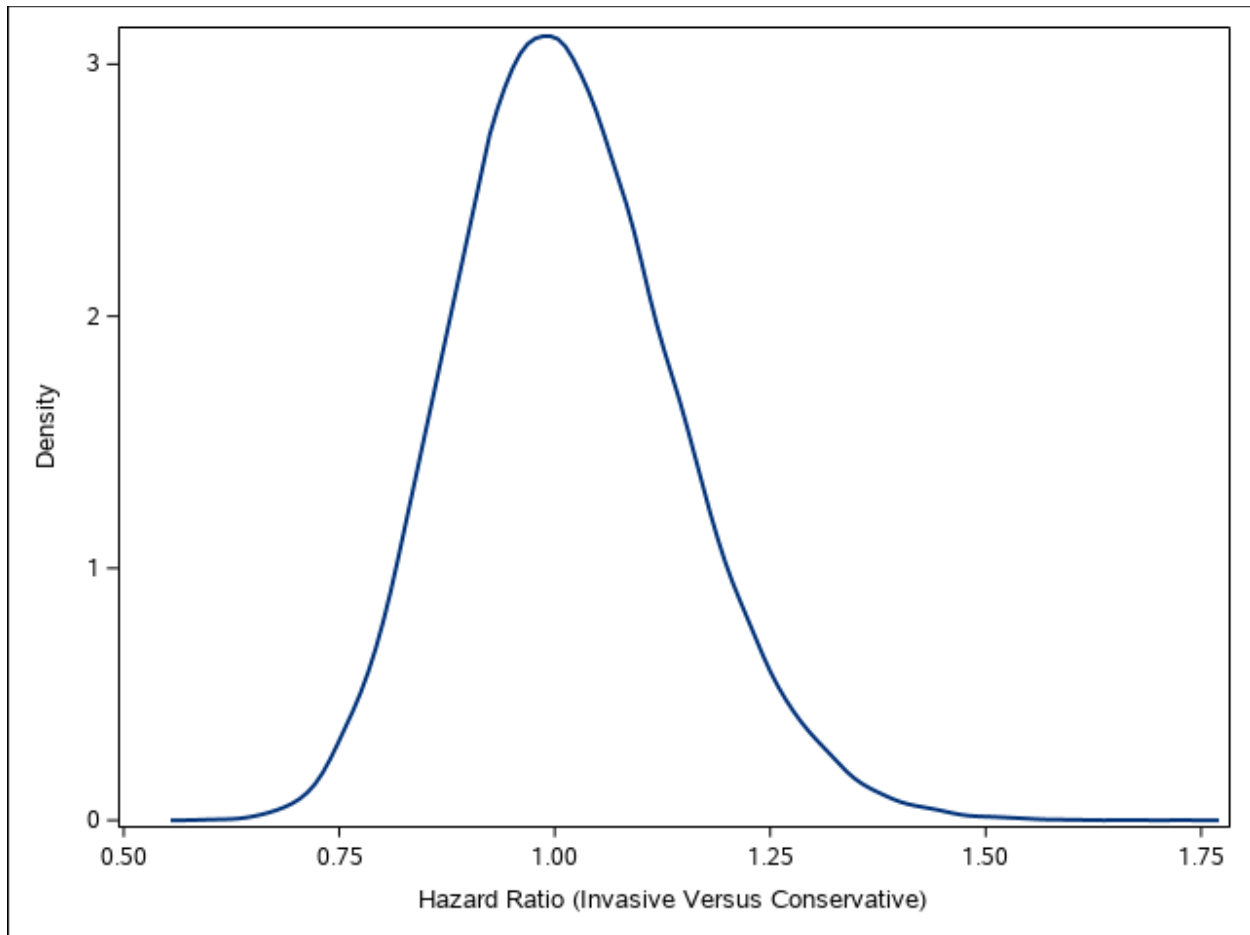

Interpretation: The post-trial probability that the true adjusted hazard ratio is between two number, say  $a$  and  $b$ , is proportional to the area under the curve between  $a$  and  $b$  on the x-axis.

References:

- Kalbfleisch JD. Non-parametric Bayesian analysis of survival time data. *Journal of the Royal Statistical Society: Series B.* 1978 Jan;40(2):214-21.
- Sinha D, Ibrahim JG, Chen MH. A Bayesian justification of Cox's partial likelihood. *Biometrika.* 2003 Sep 1;90(3):629-41.



**Figure S7. Cumulative Incidence Plot of Non Procedural MI and Procedural MI**  
**S7a. Non Procedural MI**

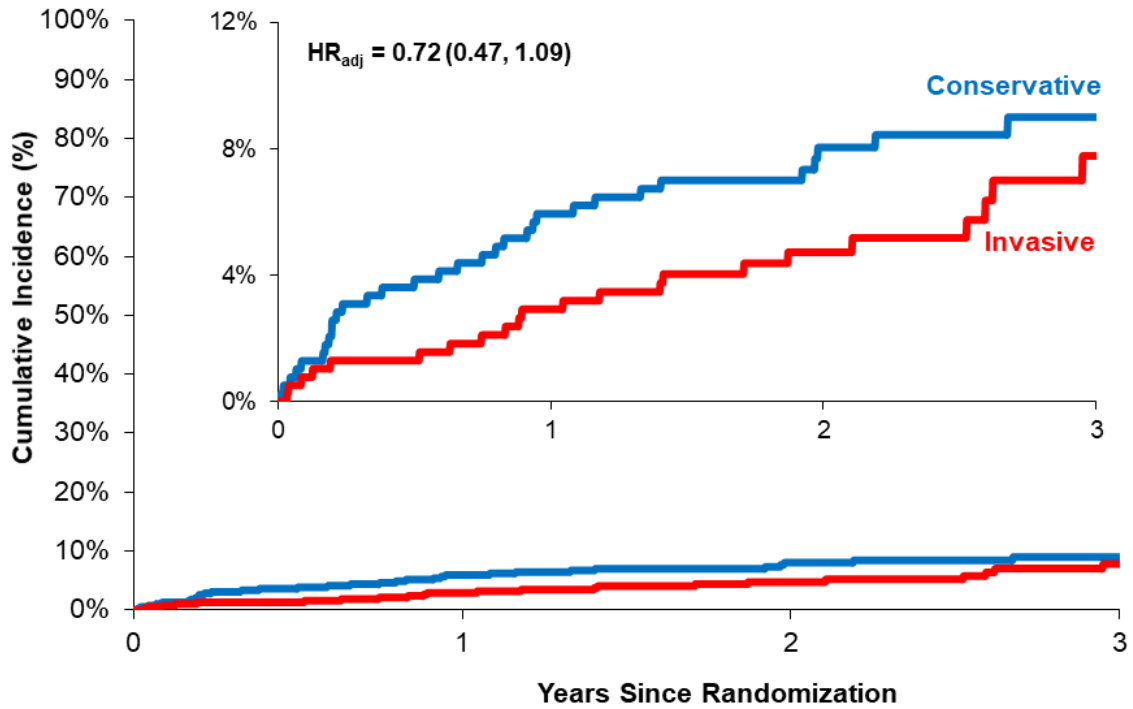

**No. at Risk**

|              |     |     |     |    |
|--------------|-----|-----|-----|----|
| Conservative | 389 | 332 | 213 | 94 |
| Invasive     | 388 | 322 | 191 | 81 |

**S7b. Procedural MI**

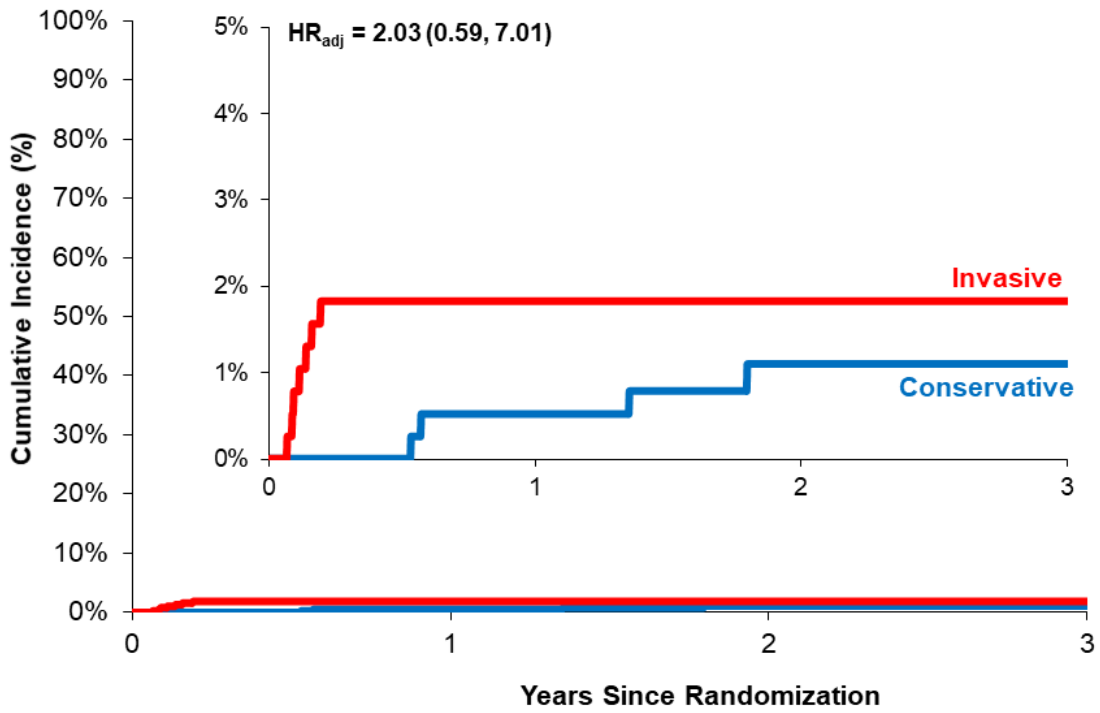

**No. at Risk**

|              |     |     |     |     |
|--------------|-----|-----|-----|-----|
| Conservative | 389 | 349 | 230 | 107 |
| Invasive     | 388 | 333 | 203 | 90  |

Figure S8. Cumulative Incidence Plot of Stroke

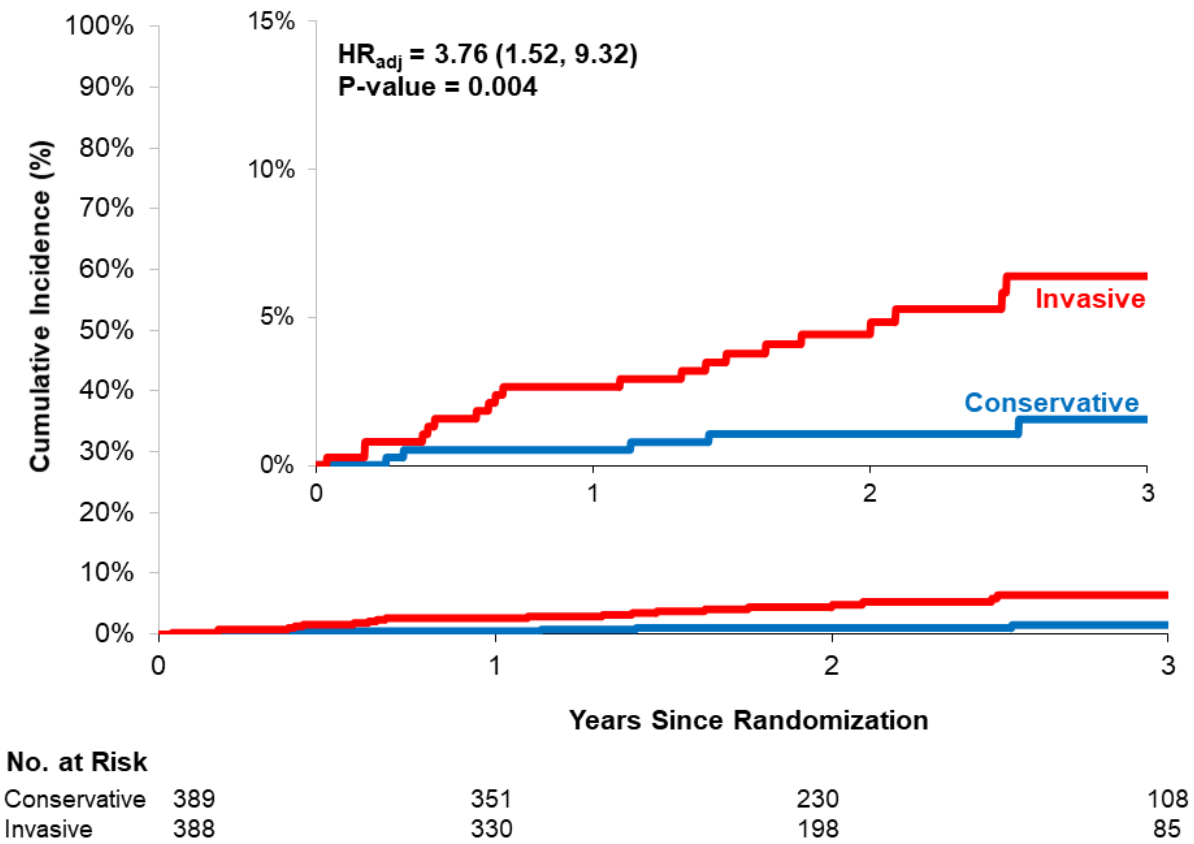

Figure S9. Cumulative Incidence Plot of Death or Initiation of Dialysis (in those not on dialysis at baseline)

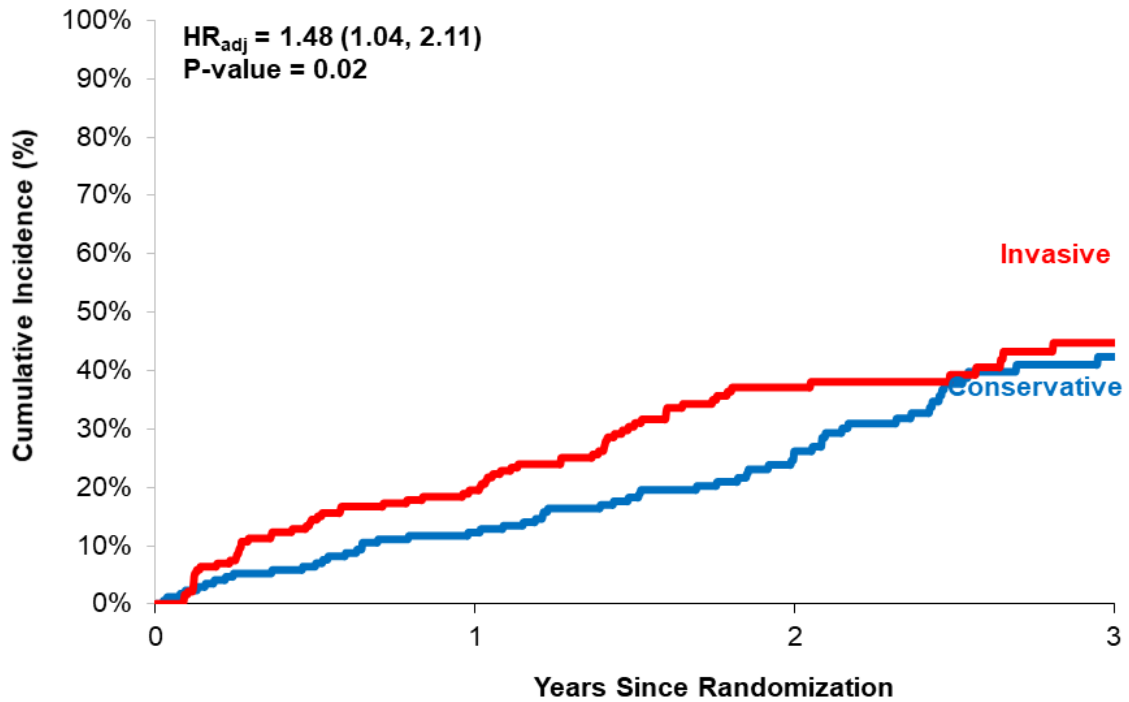

**No. at Risk**

|              |     |     |    |    |
|--------------|-----|-----|----|----|
| Conservative | 172 | 150 | 95 | 41 |
| Invasive     | 190 | 144 | 69 | 29 |

Figure S10. Cumulative Incidence Plot of New Dialysis

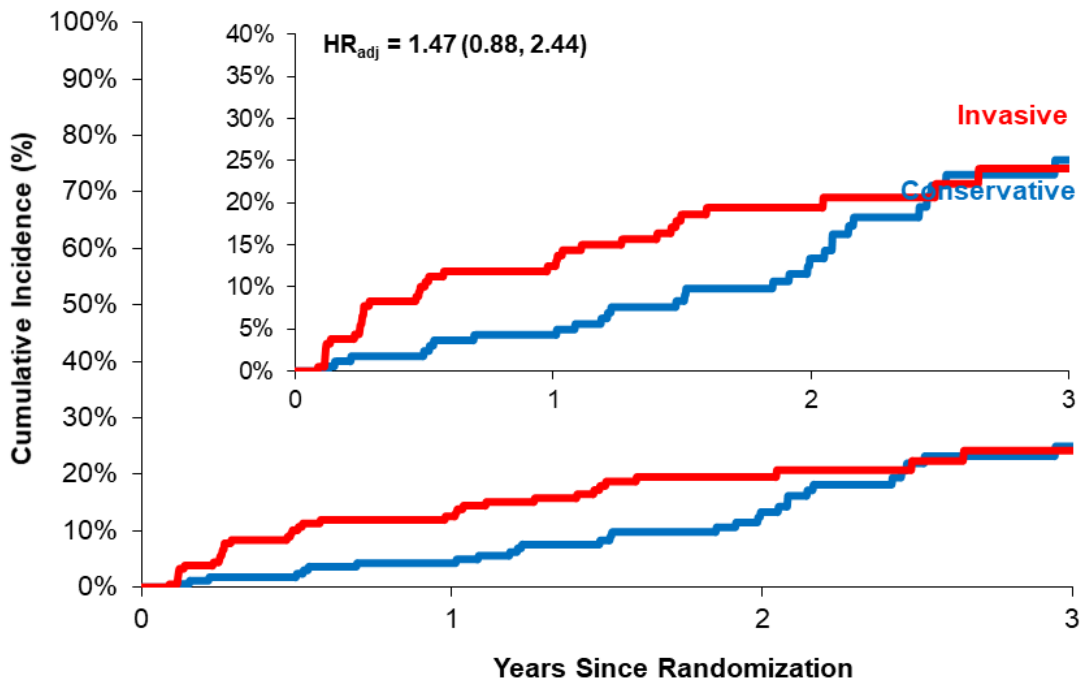

**No. at Risk**

|              |     |     |    |    |
|--------------|-----|-----|----|----|
| Conservative | 172 | 147 | 91 | 40 |
| Invasive     | 190 | 138 | 67 | 27 |

### Figure S11. Heterogeneity of Treatment Effect Analyses for the Major Secondary Outcome

There were no significant interactions between the subgroups and randomization arm except for site-determined ischemia eligibility (P = 0.02).

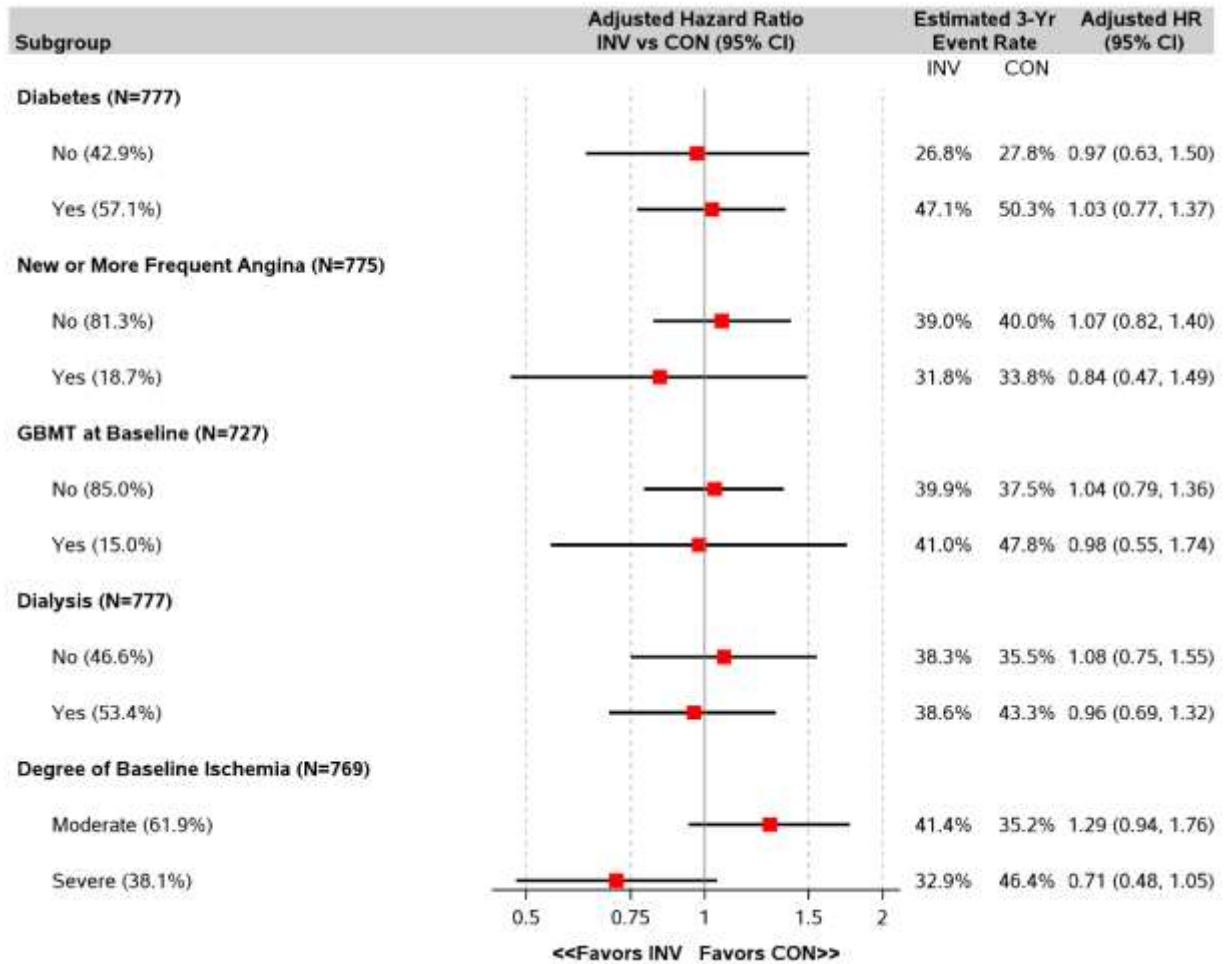

**Figure S12. Heterogeneity of Treatment Effect for the Primary Outcome as a Function of Baseline Ejection Fraction**

The reference treatment group is the Conservative group. The range of values displayed on X-axis represent the 1st and 99th percentile of the observed distribution.

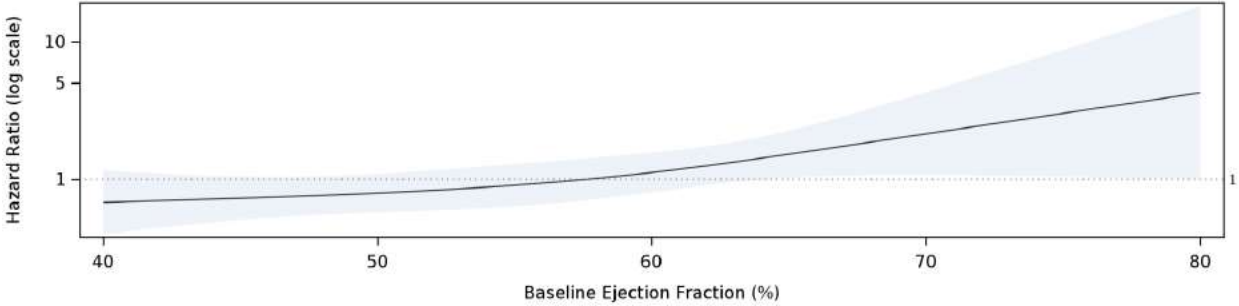

**Figure S13. Heterogeneity of Treatment Effect for the Primary Outcome as a Function of Baseline eGFR**

The reference treatment group is the Conservative group. The range of values displayed on X-axis represent the 1st and 99th percentile of the observed distribution.

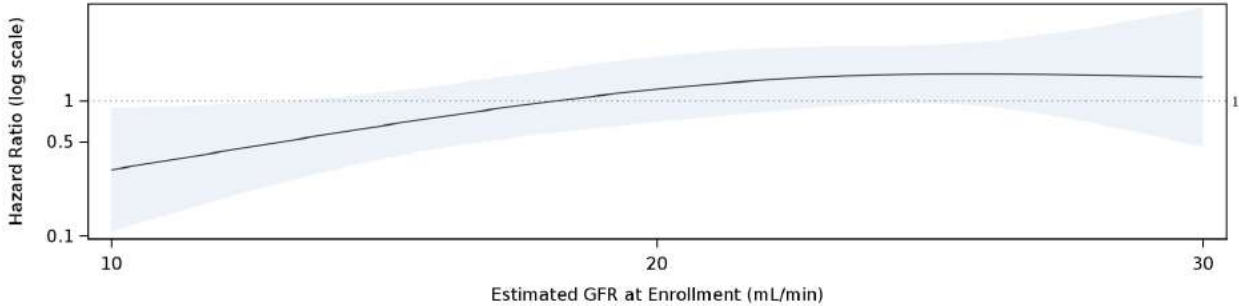

Supplement: NIHMS1590458-supplement-Supplement1.pdf [file NIHMS1590458-supplement-Supplement1.pdf]
